1           **Prime-boost vaccination of mice and Rhesus macaques with two novel**  
2                           **adenovirus vectored COVID-19 vaccine candidates**

3 Shengxue Luo<sup>1,2,3</sup>, Panli Zhang<sup>2,3</sup>, Bochao Liu<sup>2,3</sup>, Chan Yang<sup>4</sup>, Chaolan Liang<sup>2,3</sup>, Qi  
4 Wang<sup>2,3</sup>, Ling Zhang<sup>2</sup>, Xi Tang<sup>2,5</sup>, Jinfeng Li<sup>2,6</sup>, Shuiping Hou<sup>2,7</sup>, Jinfeng Zeng<sup>8</sup>,  
5 Yongshui Fu<sup>2,9</sup>, Jean-Pierre Allain<sup>2,10</sup>, Tingting Li<sup>2\*</sup>, Yuming Zhang<sup>1\*</sup>, Chengyao Li<sup>2\*</sup>

6

7 <sup>1</sup> Department of Pediatrics, Shenzhen Hospital, Southern Medical University,  
8 Shenzhen, China;

9 <sup>2</sup> Department of Transfusion Medicine, School of Laboratory Medicine and  
10 Biotechnology, Southern Medical University, Guangzhou, China;

11 <sup>3</sup> Guangzhou Bai Rui Kang (BRK) Biological Science and Technology Limited  
12 Company, China;

13 <sup>4</sup> School of Pharmaceutical Sciences, Southern Medical University, Guangzhou,  
14 China;

15 <sup>5</sup> Department of Infection, The First People's Hospital of Foshan, Foshan, China;

16 <sup>6</sup> Shenzhen Key Laboratory of Molecular Epidemiology, Shenzhen Center for Disease  
17 Control and Prevention, Shenzhen, China;

18 <sup>7</sup> Guangzhou Center for Disease Control and Prevention, Guangzhou, China;

19 <sup>8</sup> Shenzhen Blood Center, Shenzhen, China;

20 <sup>9</sup> Guangzhou Blood Center, Guangzhou, China;

21 <sup>10</sup> Emeritus Professor, University of Cambridge, Cambridge, UK.

22

23 \* **Corresponding to:** Chengyao Li or Tingting Li, Department of Transfusion

24 Medicine, School of Laboratory Medicine and Biotechnology, Southern Medical

25 University, Guangzhou, China (email: [chengyaoli@hotmail.com](mailto:chengyaoli@hotmail.com);

26 [apple-ting-007@163.com](mailto:apple-ting-007@163.com)); Yuming Zhang, Southern Medical University Shenzhen

27 Hospital, Shenzhen, China (email: [yumingzhang1966@hotmail.com](mailto:yumingzhang1966@hotmail.com)).

28

29

30 **ABSTRACT**

31 COVID-19 vaccines are being developed urgently worldwide, among which  
32 single-shot adenovirus vectored vaccines represent a major approach. Here, we  
33 constructed two novel adenovirus vectored COVID-19 vaccine candidates on simian  
34 adenovirus serotype 23 (Sad23L) and human adenovirus serotype 49 vectors (Ad49L)  
35 carrying the full-length gene of SARS-CoV-2 spike protein (S), designated  
36 Sad23L-nCoV-S and Ad49L-nCoV-S vaccines, respectively. The immunogenicity  
37 elicited by these two vaccine strains was individually evaluated in mice. Specific  
38 humoral and cellular immune responses were proportionally observed in a  
39 dose-dependent manner, and stronger response was obtained by boosting.  
40 Furthermore, five rhesus macaques were intramuscularly injected with a dose of  
41  $5 \times 10^9$  PFU Sad23L-nCoV-S vaccine for prime vaccination, followed by boosting  
42 with  $5 \times 10^9$  PFU of Ad49L-nCoV-S vaccine at 4-week interval. Three macaques were  
43 injected with Sad23L-GFP and Ad49L-GFP vectorial viruses as negative controls.  
44 Both mice and macaques tolerated well the vaccine inoculations without detectable  
45 clinical or pathologic changes. In macaques, prime-boost vaccination regimen  
46 induced high titers of  $10^{3.16}$  S-binding antibody (S-BAb),  $10^{2.75}$  cell receptor binding  
47 domain (RBD)-BAb and  $10^{2.38}$  neutralizing antibody (NAb) to pseudovirus a week  
48 after boosting injection, followed by sustained high levels over 10 weeks of  
49 observation. Robust IFN- $\gamma$  secreting T-cell response ( $712.6$  SFCs/ $10^6$  cells), IL-2  
50 secreting T-cell response ( $334$  SFCs/ $10^6$  cells) and intracellular IFN- $\gamma$  expressing

51 CD4<sup>+</sup>/CD8<sup>+</sup> T cell response (0.39%/0.55%) to S peptides were detected in the  
52 vaccinated macaques. It was concluded that prime-boost immunization with  
53 Sad23L-nCoV-S and Ad49L-nCoV-S vaccines can safely elicit strong immunity in  
54 animals in preparation of clinical phase 1/2 trials.

55

56 **Key word:** COVID-19 vaccines, simian adenovirus 23 vector, human adenovirus 49  
57 vector, prime-boost vaccination, mice and non-human primates.

58

## 59 INTRODUCTION

60 Novel coronavirus disease 2019 (COVID-19) usually presents as severe acute  
61 respiratory syndrome triggered by SARS-CoV-2 infection (1, 2), which has become  
62 globally pandemic and killed nearly one million people worldwide (WHO  
63 Coronavirus Disease [COVID-19] Dashboard) (3). Currently the most urgent need is  
64 to develop safe and effective vaccines that prevent SARS-CoV-2 infection.

65 SARS-CoV-2 is a positive-sense single-stranded RNA virus, encoding four  
66 structural proteins, including spike (S), envelope (E), membrane (M) and  
67 nucleocapsid (N) (4, 5). The S protein is a glycoprotein carrying the cell receptor  
68 binding domain (RBD), and is a major protective antigen that may elicit potent  
69 neutralizing antibody (NAb) and cellular immunity (4, 5). Therefore, S protein has  
70 been the primary target antigen for developing recombinant vaccines.

71 According to the World Health Organization (WHO) report for a draft landscape  
72 of COVID-19 candidate vaccines on August 28, 2020, there are 33 vaccine candidates  
73 in clinical evaluation, which are mainly distributed across five types of  
74 biotechnological platforms, *i.e.*, inactivated virus, DNA, RNA, protein subunit and  
75 non-replicating viral vector vaccines (6). Among COVID-19 candidate vaccines in  
76 clinical trials, five non-replicating adenovirus vectored vaccines progressed to the  
77 frontline, of which one (CanSino Biological Inc./Beijing Institute of Biotechnology)  
78 has been approved for emerging use in Chinese military personal, one (Gamaleya  
79 Research Institute) has been registered in Russia, and two have been in initial phase

80 III clinical trial (University of Oxford/AstraZeneca; Janssen Pharmaceutical  
81 Companies), and one in phase I clinical trial (ReiThera/LEUKOCARE/Univercells),  
82 respectively. Recombinant adenovirus vectors originated from various serotype of  
83 strains have displayed good safety profiles and induced broad and strong humoral and  
84 cellular immune responses, which have been widely used for research and  
85 development of vaccines (7). Based on the published data regarding human  
86 adenovirus type 5 (Ad5), chimpanzee adenovirus type 25Y (ChAdOx1) and human  
87 adenovirus type 26 (Ad26) vectorial COVID-19 vaccines (8-14), results showed that a  
88 single-shot vaccine prevented SARS-CoV-2 pneumonia in rhesus macaques and  
89 hamsters, and elicited significant immune response in the majority of recipients in  
90 phase I/II clinical trials. However, relatively weaker protection in animals and lower  
91 immune response in humans were observed with a single dose of vaccine compared  
92 with prime-boost immunizations by two or three doses of inactivated virus or mRNA  
93 vaccines (15-19). Enhancement of immune response was evidenced by prime and  
94 boost vaccination regimens with homologous boosting of ChAdOx1 nCoV-19 in  
95 animals and humans (11,20), or with heterologous Ad26 and Ad5 vectored  
96 COVID-19 vaccines in humans (21).

97 In this study, two novel simian adenovirus type 23 (SAdV23) and human  
98 adenovirus type 49 (HAdV49) derived vectors (Sad23L and Ad49L) were used for  
99 developing the COVID-19 vaccines carrying the full-length S gene of SARS-CoV-2  
100 (22, 23) designated Sad23L-nCoV-S and Ad49L-nCoV-S vaccines, respectively.

101 These two adenovirus vectored COVID-19 vaccines presented high infectious titers  
102 and low frequencies of pre-existing immunity in humans. Immunogenicity was  
103 extensively evaluated in mice and rhesus macaques by prime-boost vaccinations with  
104 these two novel heterologous adenovirus vectored vaccines.

105

## 106 **RESULTS**

107

### 108 **Production and characterization of Sad23L-nCoV-S and Ad49L-nCoV-S** 109 **vaccines**

110 An optimized and synthesized full-length S gene of SARS-CoV-2 was cloned into the  
111 deleted E1 region under cytomegalovirus (CMV) promoter regulation within two  
112 novel adenovirus vectorial Sad23L and Ad49L plasmids, designated as  
113 Sad23L-nCoV-S or Ad49L-nCoV-S, respectively (Fig. 1A). The recombinant  
114 adenoviruses were rescued from HEK-293A. A large amount of Sad23L-nCoV-S and  
115 Ad49L-nCoV-S candidate vaccines were produced from HEK-293A cell cultures, and  
116 further purified and titrated over  $10^{11}$  PFU/ml.

117 Expression of S protein was verified in Sad23L-nCoV-S and Ad49L-nCoV-S  
118 vaccine strains infected HEK-293A cells by Western blot with rabbit polyclonal  
119 anti-RBD antibodies and COVID-19 patient's serum IgG, respectively, but not in the  
120 Sad23L-GFP and Ad49L-GFP vectorial viruses infected cells (Fig. 1B). The  
121 expression of S protein in the vaccine strains-infected HEK-293A cells was also

122 observed in red color by an immunofluorescence staining, but not in the  
123 adenovirus-GFP infected control cells (Fig. 1C). These results indicated that  
124 Sad23L-nCoV-S and Ad49L-nCoV-S vaccines could effectively produce  
125 SARS-CoV-2 S protein in the infected cells.

126 To measure pre-existing immunity to these two vectors, 600 healthy blood donor  
127 samples were collected from six cities crossing the south, north, east, west and central  
128 regions of China and were tested for neutralizing antibodies (NAb) reacting with  
129 Sad23L-GFP, Ad49L-GFP and Ad5-GFP viruses, respectively. The seroprevalence of  
130 Sad23L, Ad49L and Ad5 was 10.2%, 2.2% or 75.2% respectively (Fig. 1D),  
131 indicating that Sad23L and Ad49L vectors had low pre-exposure rate in the Chinese  
132 population.

133

#### 134 **Animal tolerance of Sad23L-nCoV-S and Ad49L-nCoV-S vaccine inoculation**

135 C57BL/6 mice (n=5 per group) were intramuscularly injected with individual  
136 Sad23L-nCoV-S and Ad49L-nCoV-S vaccines at doses of  $10^7$ ,  $10^8$  and  $10^9$  PFU or by  
137 prime-boost immunization with these two adenovirus vectored vaccines ( $10^9$   
138 PFU/each) at 4 week interval and compared with vectors and PBS controls,  
139 respectively. Mice tolerated well the various doses of vaccines or vector controls at 28  
140 or 56 days, presenting no obvious change of weight and body temperature when  
141 compared with injected PBS (Fig. 2A). In addition, histopathological examination of  
142 brain, lung, heart, liver, kidney and muscle tissues (at intramuscular injection site and



143 para-tissues) did not present significant pathological lesions over 4 weeks following  
144 the prime only or prime-boost injections (Fig. S1).

145 Vaccination (n=5) and sham control (n=3) groups of rhesus macaques (Table S1)  
146 were first injected with  $5 \times 10^9$  PFU Sad23L-nCoV-S vaccine or Sad23L-GFP control,  
147 and then at 4 week interval, animals were injected with a second dose of  $5 \times 10^9$  PFU  
148 Ad49L-nCoV-S vaccine or Ad49L-GFP control, respectively. During the course of  
149 immunization, clinical parameters were monitored for eight weeks. All monkeys  
150 displayed normal appetite and mental state, and no obvious change of weight and  
151 body temperature was observed with these eight animals (Fig. 2B). Hematological  
152 and biochemical examination of blood samples showed no notable variation when  
153 comparing the vaccinated or vector control animals during 8 weeks pre-vaccination  
154 and post-vaccination (Fig. S2; Table S2).

155

### 156 **A single-shot immunization of Sad23L-nCoV-S or Ad49L-nCoV-S vaccine** 157 **induced specific immune response in mice**

158 To evaluate the immunogenicity of individual Sad23L-nCoV-S and Ad49L-nCoV-S  
159 vaccines, a single dose of  $10^7$ ,  $10^8$  or  $10^9$  PFU Sad23L-nCoV-S or Ad49L-nCoV-S  
160 vaccine was intramuscularly injected to C57BL/6 mice (n=5/group). Vector control  
161 groups (n=5/group) received  $10^9$  PFU Sad23L-GFP or Ad49L-GFP viruses, and naïve  
162 control group (n=5) received an equal volume of PBS, respectively. Four weeks  
163 post-immunization, titers of S or RBD binding antibody (S-BAb or RBD-BAb) were

164 quantified by ELISA in a dose-dependent manner with both Sad23L-nCoV-S and  
165 Ad49L-nCoV-S immunized mice, but not in the control groups ( $P<0.001$ , Fig. 3,  
166 A-D). A dose of  $10^9$  PFU Sad23L-nCoV-S vaccine induced antibody titers of  $10^{4.27}$   
167 S-BAb and  $10^{3.98}$  RBD-BAb (Fig. 3, A and B), while the same dose of  
168 Ad49L-nCoV-S vaccine induced titers of  $10^{3.02}$  S-BAb and  $10^{2.42}$  RBD-BAb,  
169 respectively (Fig. 3, C and D).

170 The neutralizing antibody (NAb) titers to SARS-CoV-2 were titrated in two  
171 individual vaccine immunized mice by surrogate virus based NAb test (sVNT) and  
172 pseudovirus-based NAb test (pVNT) at 50% inhibitory dilution ( $ID_{50}$ ), respectively  
173 (Fig. 3, E-H). A dose of  $10^9$  PFU Sad23L-nCoV-S vaccine induced NAb titers of  
174  $10^{2.41}$  sVNT( $ID_{50}$ ) and  $10^{2.79}$  pVNT ( $ID_{50}$ ) (Fig. 3, E and F), and Ad49L-nCoV-S  
175 vaccine induced titers of  $10^{1.38}$  sVNT ( $ID_{50}$ ) and  $10^{1.57}$  pVNT( $ID_{50}$ ), respectively (Fig.  
176 3, G and H).

177 Specific T-cell response of isolated splenocytes was examined in vaccinated and  
178 sham mice after stimulation with S peptides, S protein and RBD protein, respectively  
179 (Fig. 3, I-N; Fig. S3). A single dose of Sad23L-nCoV-S vaccine elicited strong  
180 specific IFN- $\gamma$  secreting T cell response to S peptides (450.2-898.4 SFCs/million cells,  
181 Fig. 3I) and S protein (81.5-246.8 SFCs/million cells, Fig. 3J), while a dose of  
182 Ad49L-nCoV-S vaccine induced similar pattern of IFN- $\gamma$  secreting T cell response  
183 (336.8-857.1 or 82.8-232 SFCs/million cells, Fig. 3, K and L). Both vaccines elicited  
184 T cell response significantly higher than sham controls ( $P<0.001$ ), but response to

185 RBD protein was not significantly different ( $P>0.05$ , Fig. S3, A and B). Specific  
186 intracellular levels of IFN- $\gamma$ , TNF- $\alpha$  and IL-2 expressing CD4<sup>+</sup> or CD8<sup>+</sup> T cell  
187 response to S peptides were measured by ICS, in which significantly higher frequency  
188 of IFN- $\gamma$  and TNF- $\alpha$  but not IL-2 expressing CD4<sup>+</sup>/CD8<sup>+</sup> T-cells was found in both  
189 Sad23L-nCoV-S and Ad49L-nCoV-S vaccinated mice compared to sham mice  
190 ( $P<0.001$ , Fig. 3, M and N; Fig. S3, C-F).

191 Overall, individual Sad23L-nCoV-S or Ad49L-nCoV-S vaccinated mice  
192 developed specific BAb and NAb antibodies and T cell responses to S protein, RBD  
193 protein or S peptides of SARS-CoV-2 in a dose-dependent fashion (Fig. 3),  
194 suggesting strong immunogenicity of the two novel adenovirus vectored COVID-19  
195 vaccines.

196

### 197 **Prime-boost immunization of mice with Sad23L-nCoV-S and Ad49L-nCoV-S** 198 **vaccines**

199 To further improve reactivity and longevity of immune response to vaccines, the  
200 prime-boost vaccination regimen was utilized to immunize C57BL/6 and BALB/c  
201 mice (n=5/group) with a prime dose of 10<sup>9</sup> PFU Sad23L-nCoV-S on day 0 and a  
202 boost dose of 10<sup>9</sup> PFU Ad49L-nCoV-S on day 28 (Fig. 4A). In comparison with  
203 prime immunization with Sad23L-nCoV-S, a booster with Ad49L-nCoV-S  
204 significantly increased BAb and NAb titers in C57BL/6 and BALB/c mice ( $P<0.001$ ;  
205 Fig. 4, B-G), and titers were maintained at high level for 10 weeks of monitoring (Fig.

206 **4, D and G**). Profiling of IgG subclasses showed a predominant serum IgG2a to RBD  
207 protein associating with Th1 response in prime-boost vaccinated mice (Fig. S4).  
208 Regarding specific T cell response, the boosting with Ad49L-sCoV-S on  
209 Sad23L-nCoV-S prime immunization enhanced or stabilized specific IFN- $\gamma$ -secretion  
210 T cell responses to S peptides, S protein or RBD protein (Fig. 4H), as well as levels of  
211 intracellular cytokines IFN- $\gamma$  and TNF- $\alpha$  but not of IL-2 response to S peptides  
212 compared with single dose of vaccine vaccinated or sham control C57BL/6 and  
213 BALB/c mice (Fig. 4I; Fig. S5).

214 Taken together, the results suggest that prime-boost vaccination of two species of  
215 mice with Sad23L-nCoV-S followed by Ad49L-nCoV-S enhanced specific immune  
216 response to SARS-CoV-2 when compared with prime vaccination only with a  
217 single-shot of Sad23L-nCoV-S or Ad49L-nCoV-S vaccine.

218

219 **Rhesus macaques' specific immune response to prime-boost vaccination with**  
220 **combined Sad23L-nCoV-S and Ad49L-nCoV-S vaccines**

221 Eight rhesus macaques aged 11-14 years were selected and tested for the baseline  
222 values of antibody and T-cell response to SARS-CoV-2 S from blood samples in  
223 pre-vaccination at week -1 or week 0 (Fig. 5A; Table S1). The pre-existing NAb titer  
224 to Sad23L, Ad49L or Ad5 was detected < 1:10 in serum samples from all eight  
225 animals (Table. S1).

226 Five rhesus macaques were intramuscularly injected first with a dose of  $5 \times 10^9$   
227 PFU Sad23L-nCoV-S vaccine, then with a boost injection of  $5 \times 10^9$  PFU  
228 Ad49L-nCoV-S vaccine 4 weeks later, while three sham rhesus macaques controls  
229 were injected with equal doses of Sad23L-GFP and Ad49L-GFP viruses, respectively  
230 (Fig. 5A). Blood samples were collected weekly from these two groups of animals.  
231 Both BAb (S-BAb and RBD-BAb) and NAb (sVNT and pVNT) levels were titrated  
232 in the vaccinated group but not in sham group. BAb and NAb reactivity increased at  
233 week 2 post prime-immunization, at week 4 (W0 for boost-immunization), at weeks 5  
234 and 6 and then stayed at high levels up to week 10 (Fig. 5, B-E). Titers of  $10^{3.16}$   
235 S-BAb (Fig. 5B),  $10^{2.75}$  RBD-BAb (Fig. 5C),  $10^{2.01}$  sVNT(ID<sub>50</sub>) (Fig. 5D) and  $10^{2.38}$   
236 pVNT(ID<sub>50</sub>) (Fig. 5E) were quantified and found higher than the corresponding  
237 antibody titers found in sera from 25 asymptomatic, 14 mild and 9 severe COVID-19  
238 convalescent patients (Fig. 5, B-E). Strong correlation between BAb and NAb titers  
239 was observed ( $P < 0.0001$ ,  $R = 0.784-0.927$ ; Fig. 5, F and G), suggesting the reliability  
240 of these antibody quantitative assays.

241 PBMCs were isolated from whole blood of pre- and post-immunized monkeys  
242 for evaluation of T cell responses to S peptides, S and RBD protein by ELISpot and  
243 ICS (Fig. 6). Prime vaccination with a dose of Sad23L-nCoV-S vaccine induced an  
244 increase of IFN- $\gamma$  secreting T cell response to S peptides (406.6-526.3 SFCs/million  
245 cells) at weeks 2 and 4 post prime-vaccination, and then boosting with a dose of  
246 Ad49L-nCoV-S vaccines enhanced the IFN- $\gamma$  secreting T cell response (583.9-712.6

247 SFCs/million cells) at weeks 5 to 8 (Fig. 6A). IFN- $\gamma$  secreting T cell reaction to S and  
248 RBD proteins stayed at high levels after prime-boost immunizations (Fig. 6, B and C).  
249 Relatively high IL-2 secreting T cell response to S peptides, S and RBD proteins was  
250 observed (Fig. 6, D-F), but weak IL-4 secreting T cell response by ELISpot (Fig. S6).  
251 Frequency of intracellular IFN- $\gamma$  expressing CD4<sup>+</sup>/CD8<sup>+</sup> T-cell responses to S  
252 peptides was observed in vaccinated macaques at weeks 2 to 8 (Fig. 6, G-J),  
253 significantly higher than observed in pre-vaccination and sham controls ( $P<0.01$ ).  
254 Frequency of intracellular TNF- $\alpha$  expressing CD4<sup>+</sup> T cell response was also found  
255 significantly different between vaccinated and sham monkeys ( $P<0.05$ ; Fig. S7, A and  
256 B), but intracellular TNF $\alpha$ <sup>+</sup> CD8<sup>+</sup> or IL-2<sup>+</sup> CD4<sup>+</sup>/CD8<sup>+</sup> T cell response to S peptides  
257 was not statistically different between groups ( $P>0.05$ ; Fig. S7, C-F).

258 In summary, prime-boost vaccination with Sad23L-nCoV-S and Ad49L-nCoV-S  
259 vaccines at an interval of 4 weeks elicited higher levels of specific antibody and T-cell  
260 responses against SARS-CoV-2 in rhesus macaques, which was recommended as  
261 COVID-19 vaccine candidates for clinical trials in humans.

262

### 263 **Biodistribution of Sad23L-nCoV-S and Ad49L-nCoV-S vaccine strains in the** 264 **tissues of inoculated mice**

265 Neutralizing antibody titers to Sad23L and Ad49L vectors were determined in rhesus  
266 macaques and mice after prime only and prime-boost vaccinations (Fig. 7, A and B;

267 Fig. S8). A high NAb reactivity to an individual adenoviral vector of either Sad23L or  
268 Ad49L in macaques (1:1280 or 1:640) and mice (1:576 or 1:352) was induced post  
269 prime immunization, but not enhanced post boost vaccination with a heterologous  
270 vector (Fig. 7, A and B), which might limit the homologous boosting of adenovirus  
271 vectored vaccines. The lung, spleen, liver and muscle tissues (at intramuscular  
272 injection site and para-tissues) from prime only or prime-boost immunized C57BL/6  
273 mice were examined 4 weeks after inoculation of vaccines in order to assess vaccine  
274 delivery by amplifying specific adenoviral hexon sequences of both Sad23L and  
275 Ad49L vectors. The predicted 500bp PCR band was detected in lung, spleen and liver  
276 tissues after Sad23L-nCoV-S vaccination, while the PCR band was observed in lung  
277 and liver tissues but not found in the spleen after Ad49L-nCoV-S vaccination (Fig.  
278 7C). The expression of S antigen was observed in splenocytes and hepatocytes from  
279 prime-only Sad23L-nCoV-S or Ad49L-nCoV-S and prime-boost vaccines inoculated  
280 C57BL/6 mice by immunofluorescence staining (Fig. 7D), but not found in lung and  
281 muscle tissues (Fig. S9).

282

## 283 **DISCUSSION**

284

285 A safe and effective COVID-19 vaccine is one of the most wanted goods in the world.  
286 Among 33 COVID-19 candidate vaccines in clinical trials (WHO report on 28 August  
287 2020) (6), 9 vaccines have initiated clinical phase III trial, and experimental data from

288 pre-clinical and/or clinical studies have been published (8-21). In the frontline of  
289 COVID-19 vaccine candidates in clinical trial phase III, the range of approaches  
290 includes three inactivated virus, two lipid nanoparticle (LNP)-encapsulated mRNA  
291 and four non-replicating adenovirus vectored vaccines (6). Beyond general comments  
292 on the disadvantages of major types of COVID-19 vaccines (24,25), the limitations of  
293 inactivated SARS-CoV-2 vaccines are crucial biosafety concerns regarding large  
294 amounts of infectious virus being processed above biological safety level-3 (BSL-3)  
295 condition and production capacity; for LNP-mRNA vaccines instability and lack of  
296 evidence for efficacy are puzzling; for adenovirus vectored vaccines, pre-existing  
297 immunity to the carrier virus and the relative weakness of single-shot immunization  
298 appear limiting factors.

299 In this study, we generated two novel adenovirus vectored COVID-19 vaccines  
300 encoding the full-length S gene of SARS-CoV-2. The intact S glycoprotein rather  
301 than the shorter S or RBD proteins was shown to be the most effective antigen  
302 eliciting protective immunity against SARS-CoV-2 infection in DNA vaccines and  
303 Ad26 vectored vaccines (12,13,26). The vectors Sad23L and Ad49L originated from  
304 simian adenovirus type 23 and human adenovirus type 49, respectively (22,23), are  
305 novel adenoviral vector. Comparing Ad5-vectored COVID-19, ChAdox1 nCoV-19  
306 and Ad26.COVS vaccines (8-12,14,21), three attractive aspects emphasized in this  
307 study are highlighted below.



308 Firstly, there is a low-seroprevalence of pre-existing antibodies to Sad23L and  
309 Ad49L vectors in humans. According to the investigation of NAb to three types of  
310 adenoviruses in Chinese population, the prevalence of both Sad23L and Ad49L NAb  
311 was below 10%, while the prevalence of Ad5 NAb was over 75% (Fig. 1D). However,  
312 the pre-existing anti-Ad5 immunity might partly limit vaccine effectiveness,  
313 especially for populations aged over 50 (8,9,24,25), while the low seroprevalence of  
314 antibodies to novel adenoviral vectors such as ChAdox1 (11), Ad26 (12,14,21,27),  
315 and Sad23L and Ad49L used in this study might avoid a negative impact on vaccine  
316 efficacy (22-24).

317 Secondly, the prime-boost vaccination regimen with two heterologous  
318 adenoviruses vectored Sad23L-nCoV-S and Ad49L-nCoV-S vaccines examined in  
319 mice and rhesus macaques suggested that the boost with Ad49L-nCoV-S vaccine  
320 significantly enhanced the levels of neutralizing antibody and IFN- $\gamma$  expressing  
321 CD4<sup>+</sup>/CD8<sup>+</sup> T cell responses following prime-immunization with Sad23L-nCoV-S  
322 vaccine (Fig. 4-6). In addition, specific IFN- $\gamma$  secretion T cell response was prolonged  
323 at high level after boosting vaccination. Two recent publications compared prime only  
324 with a single-dose of ChAdOx1 nCoV-19 and homologous boost with a second dose  
325 of ChAdOx1 nCoV-19 vaccine in mice and pigs, and human clinical trials, showed  
326 that boost vaccination significantly increased and prolonged the level of binding or  
327 neutralizing antibody response to SARS-CoV-2 (11,20). By boosting with Ad5-S  
328 vaccine the Ad26-S vaccine primed immunization, a higher level of immunity was

329 observed in humans as reported in a recent Russian study (21). Compared with  
330 homologous boosting of ChAdOx1 nCoV-19 or boosting of Ad5-S vaccines (11,21),  
331 heterologous prime-boost vaccinations with Sad23L-nCoV-S and Ad49L-nCoV-S  
332 vaccines have the advantage of avoiding vector's immunity interfering with prime  
333 vaccination or enhancing pre-existing Ad5 immunity (22-25).

334 Thirdly, in order to achieve an effective vaccine immunity, a low dose of two  
335 heterologous adenovirus vectored vaccines ( $<5 \times 10^{10}$  vp) with prime-boost  
336 immunization regimen should theoretically reduce severe adverse reaction induced by  
337 a high dose of adenovirus vectored vaccine ( $>5 \times 10^{10}$  vp) with prime only  
338 immunization in clinical trials (8,9,11,14). In this study, a relatively low dose of  
339 Sad23L-nCoV-S and Ad49L-nCoV-S vaccines elicited a robust immunity in both  
340 young mice and older rhesus macaques (aged 11-14 years), but no obvious clinical  
341 symptoms or histopathological changes were observed (Fig. 2; Fig. S1; Fig. S2).

342 There are two limitations to this work. Considering biosafety and restriction for  
343 SARS-CoV-2 virus manipulation, conventional live virus neutralization test (cVNT)  
344 and virus injection challenge experiments have not been performed in this study.  
345 However, sVNT and pVNT reported in this study have well demonstrated a  
346 significant correlation with cVNT in NAb titers to SARS-CoV-2 ( $P < 0.0001$ ,  
347  $R = 0.7678-0.8591$ ) (28). This was also evidenced by close correlation between ELISA  
348 and pVNT or cVNT by other studies using adenovirus vectored COVID-19 vaccines  
349 in rhesus macaques ( $P < 0.0001$ ,  $R = 0.8314-0.8427$ ) (12), hamsters ( $P < 0.0001$ ;

350  $R=0.7849$ ) (13) and human clinical phase II trial ( $P<0.0001$ ,  $R=0.72-0.75$ ) (9). In  
351 addition, compared with a panel of convalescent serum samples from COVID-19  
352 patients the level of binding or neutralizing antibodies observed in this study was  
353 favorable and in line with all other published data from COVID-19 vaccines.  
354 Protective efficacy of Sad23L-nCoV-S and Ad49L-nCoV-S vaccines for prime-boost  
355 vaccination of animals might be referred to ChAdOx1 nCoV-19 or Ad26.COV2.S  
356 vaccine immunized rhesus macaques against SARS-CoV-2 challenge (10,12), because  
357 Sad23L and ChAdOx1, Ad49L and Ad26 were classified in the same species E or D  
358 of adenoviruses, respectively (7).

359 In conclusion, two novel adenovirus vectored COVID-19 vaccines were  
360 produced, which could, when used in succession, safely elicit robust humoral and  
361 T-cell immune response to SARS-CoV-2 in mice and Rhesus macaques. Prime-boost  
362 vaccination regimen with priming of Sad23L-nCoV-S and boosting of  
363 Ad49L-nCoV-S vaccines were recommended to develop the better protective  
364 immunity against SARS-CoV-2 in humans. These two vaccines are being planned for  
365 clinical phase I/II trials after an extensive safety evaluation has been carried out in  
366 pre-clinical animal examination.

367

## 368 **MATERIALS AND METHODS**

369

### 370 **Rhesus macaques and ethics statement**

371 Eight healthy outbred male rhesus macaques (*Macaca mulatta*) aged 11-14 years were  
372 randomly allocated to this study (Table S1). Experimentation and sample collection  
373 were ethically approved and carried out by the Huazheng Laboratory Animal  
374 Breeding Centre, Guangzhou, China. All animal care and experimental procedures  
375 (NFYYLASOP-037) were in accordance with national and institutional policies for  
376 animal health and wellbeing.

377 The welfare issues (housing, feeding, environmental enrichment, etc.) were in  
378 accordance with the recommendations of the Weatherall report  
379 (<https://acmedsci.ac.uk/more/news/the-use-of-non-human-primates-in-research>).

380 Animals were individually housed in spacious cages and were provided with  
381 commercial food pellets supplemented with appropriate treats. Drinking water was  
382 provided ad libitum from an automatic watering system. Animals were monitored  
383 daily for health and discomfort. Blood samples were obtained using sterilized needle  
384 and syringe from the venous vessels of animal legs.

385

### 386 **Cells and mice**

387 HEK-293A, HEK-293T and HEK293T-hACE2 cells (Sino Biological) were  
388 maintained in complete Dulbecco's modified Eagle's medium (DMEM, Gibco)  
389 supplemented with 10% fetal bovine serum (FBS, Gbico) and incubated at 37 °C in  
390 5% CO<sub>2</sub>.

391 Female C57BL/6 and BALB/c mice were obtained from the Animal  
392 Experimental Centre of Southern Medical University, Guangdong, China.

393

#### 394 **COVID-19 patients' serum samples**

395 A total of 48 convalescent serum samples were provided by The First People's  
396 Hospital of Foshan, Shenzhen or Guangzhou Center for Disease Control and  
397 Prevention (CDC), China. The samples were collected from 25 asymptomatic, 14  
398 mild and 9 severe COVID-19 infected subjects. All serum samples were inactivated  
399 for 40 min by heating at 56 °C in the water bath.

400

#### 401 **Construction of two novel adenovirus vectored COVID-19 vaccine strains**

402 According to the description of Sad23L vector (SAdV23, GenBank: AY530877.1)  
403 (22,23), the replication defective adenoviral vector Ad49L was constructed by  
404 deleting the E1 and E3 regions of the full-length human adenovirus serotype 49  
405 genome (HAdV49, GenBank: DQ393829.1). The E4 region open reading frame 6  
406 (orf6) was replaced by the corresponding element of human adenovirus type 5 (Ad5)  
407 in order to improve virus propagating efficiency. The full-length S protein gene of  
408 SARS-CoV-2 (GenBank: MN908947.3) was optimized and synthesized (Beijing  
409 Genomics Institute, China) and was cloned into adenoviral vectors Sad23L and  
410 Ad49L, respectively. The recombinant adenoviral constructs Sad23L-nCoV-S and  
411 Ad49L-nCoV-S were rescued, and the novel adenovirus vectored COVID-19 vaccine

412 strains were propagated from HEK-293A packaging cells. The vaccine strains were  
413 serially passaged for stability by 12 generations when the full cytopathic effect  
414 appeared. Virus purification was performed by cesium chloride density gradient  
415 centrifugation as previously described (23).

416

#### 417 **Histopathological examination.**

418 Mice tissues were stained with hematoxylin and eosin (H&E) and examined  
419 microscopically for histopathological changes by Guangzhou Huayin Medical Science  
420 Company Limited (Guangzhou, China).

421

#### 422 **Western blotting**

423 HEK-293A cells were infected with Sad23L-nCoV-S and Ad49L-nCoV-S strains,  
424 respectively, and Sad23L-GFP and Ad49L-GFP vectorial viruses were used as mock  
425 control. The expression of SARS-CoV-2 S protein was analyzed by Western blotting  
426 with rabbit polyclonal antibody to SARS-CoV-2 RBD (Sino Biological, China) and  
427 heat-inactivated human serum samples from Chinese COVID-19 infected patients.  
428 Glyceraldehyde-3-phosphate dehydrogenase (GADPH) was included as a loading  
429 control. The membranes were washed five times and developed by Supersignal West  
430 Pico Plus chemiluminescent substrate (Thermo Scientific, USA).

431

#### 432 **Immunofluorescence staining**

433 Cells infected with vaccine strains or vector control viruses were fixed in cell culture  
434 plates, while tissues were collected from vaccinated and control mice. Cell layers or  
435 tissue frozen sections were incubated with human monoclonal antibody to  
436 SARS-CoV-2 RBD (OkayBio, China), and then washed with PBST. Anti-human  
437 IgG-Alexa Fluor 594 antibody (Thermo Scientific, USA) in 1% BSA-PBST was  
438 added to the cells for 30 min at 37 °C. DAPI was added to stain cell nuclei.

439

#### 440 **Adenovirus neutralizing antibody assay**

441 Human plasma samples were collected from 600 healthy blood donors at six blood  
442 centers (100 per center) across China, including Shenzhen (south), Guangzhou (south),  
443 Yichang (central), Harbin (northeast), Chengdu (southwest) and Xian (west) blood  
444 centers. Plasmas were tested on HEK-293A cells for neutralizing Sad23L-GFP, or  
445 Ad49L-GFP vectorial viruses by green fluorescent activity assay as previously  
446 described (22,29).

447

#### 448 **Animal immunization**

449 Female C57BL/6 mice (5-6 weeks, n=5 each group) were individually inoculated  
450 intramuscularly (i.m.) with a dose of  $10^7$ ,  $10^8$  and  $10^9$  PFU Sad23L-nCoV-S or  
451 Ad49L-nCoV-S vaccine, respectively. A dose of  $10^9$  PFU Sad23L-GFP or  
452 Ad49L-GFP vectorial virus and an equivalent volume of PBS were used as sham  
453 control.

454 Female C57BL/6 and BALB/c mice (5-6 weeks, n=5 each group) were prime  
455 inoculated intramuscularly with a dose of  $10^9$  PFU Sad23L-nCoV-S vaccine, and then  
456 at 4 week interval were boosted with a dose of  $10^9$  PFU Ad49L-nCoV-S vaccine. A  
457 dose of  $10^9$  PFU Sad23L-GFP and a dose of  $10^9$  PFU Ad49L-GFP were used as sham  
458 control.

459 Five rhesus macaques aged 11 to 14 years (Table S1) were first injected  
460 intramuscularly with a dose of  $5 \times 10^9$  PFU Sad23L-nCoV-S vaccine, and then at 4  
461 week interval received a second dose of  $5 \times 10^9$  PFU Ad49L-nCoV-S vaccine. Three  
462 rhesus macaques aged 11 to 13 years (Table S1) were vaccinated by prime-boost  
463 regimen with a dose of  $5 \times 10^9$  PFU Sad23L-GFP and a dose of Ad49L-GFP vectorial  
464 adenoviruses as sham control.

465

#### 466 **Enzyme-linked immunosorbent assay (ELISA)**

467 The microtiter plates (Corning, USA) were coated overnight with  $2 \mu\text{g/ml}$  of  
468 SARS-CoV S or RBD proteins (Sino Biological, China). Serum samples were 2-fold  
469 serially diluted and S or RBD binding antibody (S-BAb or RBD-BAb) were detected  
470 by ELISA. Secondary antibodies were goat anti-mouse IgG-HRP (Beijing Bersee  
471 Science and Technology, Co. LTd, China), rabbit anti-monkey IgG-HRP (Bioss,  
472 China) and goat anti-human IgG-HRP conjugates (Sigma, USA), respectively.  
473 Endpoint titers were defined as the highest reciprocal serum dilution that yielded an



474 absorbance > 0.2 and a ratio of signal than cutoff (S/CO) > 1. Log10 end point titers  
475 were reported (26).

476 Goat anti-mouse IgG1, IgG2a, IgG2b or IgG3 heavy chain-HRP conjugates were  
477 used for IgG sub-classification according to manufacturer's instruction (Abcam, UK).  
478

#### 479 **Surrogate virus neutralization test (sVNT)**

480 The surrogate virus based neutralization test (sVNT) was used for measuring  
481 neutralizing antibody (NAb) to SARS-CoV-2 as previously described (28). Briefly,  
482 microtiter plates (Corning) were coated overnight with 2µg/ml hACE2 protein (Sino  
483 Biological, Beijing, China) at 4 °C, followed by blocking with OptEIA assay diluent  
484 (BD). The HRP-RBD conjugate (3 ng) was pre-incubated with 100 µl of diluted  
485 serum samples for 1 h at 37 °C, then added into hACE2 pre-coated plate for 1 h at  
486 room temperature. Plates were washed five times by PBST. A colorimetric signal was  
487 developed with TMB, and equal volume of stop solution was added to terminate the  
488 reaction. The absorbance reading was performed at 450 nm and 570 nm. Inhibition  
489 rate (%) = (1 - sample optical density value/negative control optical density value) ×  
490 100.

491

#### 492 **Pseudovirus neutralization test (pVNT)**

493 Pseudoviruses expressing a luciferase reporter gene were generated for measuring of  
494 NAb to SARS-CoV-2 as previously described (26). Briefly, the packaging construct

495 psPAX2 (Addgene), plasmid pLenti-CMV Puro-Luc (Addgene), and  
496 pcDNA3.1-SARS-CoV-2 SΔCT (deletion of the cytoplasmic tail) were co-transfected  
497 into HEK-293T cells. The supernatants were collected 48 hours post-transfection and  
498 the pseudoviruses were purified by filtration through 0.45 μm filter. The pVNT titers  
499 were measured with HEK293T-hACE2 cells in 96-well tissue culture plates.  
500 Two-fold serial dilutions of heat-inactivated serum samples were prepared and mixed  
501 with 50 μl of pseudovirus. After incubation at 37 °C for 1h, the serum-virus mixture  
502 was added to HEK293T-hACE2 cells. Forty-eight hours after infection, cells were  
503 lysed in Steady-Glo Luciferase Assay (Promega) according to the manufacturer's  
504 instructions. The pVNT titer of SARS-CoV-2 antibody was defined as the sample  
505 dilution at which a 50% inhibition rate. Inhibition rate (%) =  $(1 - \text{sample RLU}/\text{virus}$   
506  $\text{control RLU}) \times 100$ . Log<sub>10</sub> pVNT(ID<sub>50</sub>) titer was reported.

507

#### 508 **ELISpot**

509 Monkey (or mouse) IFN-gamma, IL-2 or IL-4 ELISpotPLUS kits (MabTech) were  
510 used to determine SARS-CoV-2 S antigen-specific T lymphocyte response. Rhesus  
511 macaque's PBMCs ( $2 \times 10^5$  cells/well) or mouse splenocytes ( $5 \times 10^5$  cells/well) were  
512 stimulated with S peptides, S or RBD protein (5μg/ml) in triplicates, respectively.  
513 Seventy-nine peptides encoding for amino acid sequence of SARS-CoV-2 S protein  
514 were predicted (<http://www.iedb.org/>) and synthesized by Guangzhou IGE  
515 Biotechnology LTD (Table. S3). Spots were counted with a CTL Immunospot Reader

516 (Cellular Technology Ltd). The results were expressed as spot forming cells (SFCs)  
517 per million cells.

518

#### 519 **Intracellular cytokine staining (ICS) and flow cytometry**

520 Mouse splenocytes ( $2 \times 10^6$  cells/well) or monkey PBMCs ( $1 \times 10^6$  cells/well) were  
521 stimulated with S peptide pools ( $3 \mu\text{g/ml}$  each peptide), or medium as negative control,  
522 in triplicates. After 4h, the cells were incubated with Golgi Plug (BD) for 12h at  $37^\circ\text{C}$ .  
523 Cells were collected and stained with anti-mouse or anti-monkey CD3, CD4 and CD8  
524 surface marker antibodies (BD). Cells were fixed with IC fixation buffer,  
525 permeabilized with permeabilization buffer (BD) and stained with anti-mouse or  
526 anti-monkey interferon- $\gamma$  (IFN- $\gamma$ ), interleukin-2 (IL-2) and tumor necrosis factor  $\alpha$   
527 (TNF- $\alpha$ ) (BD). All samples were tested with BD FACS Canton flow cytometer (BD).

528

#### 529 **Nested-PCR amplification**

530 Genomic DNA was extracted from homogenized tissue of adenovirus vectored  
531 vaccine inoculated mice by High Pure Viral Nucleic Acid Kit (Roche). DNA  
532 fragments of Sad23L and Ad49L vectors were amplified by nested PCR with primers  
533 specific to adenoviral hexon sequences (Table S4) (23).

534

#### 535 **Statistical analyses**

536 Data are analyzed with unpaired two-tailed  $t$  test, one-way ANOVA. Neutralizing  
537 antibody titer data were log transformed before analysis. Neutralizing antibody titer  
538 data generated by the RBD-BAb and sVNT or S-BAb and pVNT assays were  
539 compared using Spearman nonparametric correlation. Statistically significant  
540 differences are indicated with asterisks (\*  $P < 0.05$ ; \*\*  $P < 0.01$  and \*\*\*  $P < 0.001$ ). All  
541 graphs are generated with GraphPad Prism 7 software.

542

## 543 REFERENCES

- 544 1. Wang C, Horby PW, Hayden FG, Gao GF. A novel coronavirus outbreak of  
545 global health concern. *Lancet*. 2020;395(10223):470-473. doi:  
546 10.1016/S0140-6736(20)30185-9.
- 547 2. Lu R, Zhao X, Li J, et al. Genomic characterisation and epidemiology of 2019  
548 novel coronavirus: implications for virus origins and receptor binding. *Lancet*.  
549 2020;395(10224):565-574. doi: 10.1016/S0140-6736(20)30251-8.
- 550 3. World Health Organization. WHO Coronavirus Disease (COVID-19) Dashboard  
551 on 5 September 2020. <https://covid19.who.int/>.
- 552 4. Walls AC, Park YJ, Tortorici MA, et al. Structure, Function, and Antigenicity of  
553 the SARS-CoV-2 Spike Glycoprotein. *Cell*. 2020;181(2):281-292. doi:  
554 10.1016/j.cell.2020.02.058.
- 555 5. Srinivasan S, Cui H, Gao Z, et al. Structural Genomics of SARS-CoV-2 Indicates  
556 Evolutionary Conserved Functional Regions of Viral Proteins. *Viruses*.  
557 2020;12(4):360. doi: 10.3390/v12040360.
- 558 6. World Health Organization. Draft landscape of COVID-19 candidate vaccines on  
559 28 August 2020.  
560 [https://www.who.int/publications/m/item/draft-landscape-of-covid-19-candidate-v](https://www.who.int/publications/m/item/draft-landscape-of-covid-19-candidate-vaccines)  
561 [accines](https://www.who.int/publications/m/item/draft-landscape-of-covid-19-candidate-vaccines).
- 562 7. Abbink P, Maxfield LF, Ng'ang'a D, et al. Construction and evaluation of novel  
563 rhesus monkey adenovirus vaccine vectors. *J Virol*. 2015;89(3):1512-22. doi:  
564 10.1128/JVI.02950-14.
- 565 8. Zhu FC, Li YH, Guan XH, et al. Safety, tolerability, and immunogenicity of a  
566 recombinant adenovirus type-5 vectored COVID-19 vaccine: a dose-escalation,  
567 open-label, non-randomised, first-in-human trial. *Lancet*.  
568 2020;395(10240):1845-1854. doi: 10.1016/S0140-6736(20)31208-3.

- 569 9. Zhu FC, Guan XH, Li YH, et al. Immunogenicity and safety of a recombinant  
570 adenovirus type-5-vectored COVID-19 vaccine in healthy adults aged 18 years or  
571 older: a randomised, double-blind, placebo-controlled, phase 2 trial. *Lancet*.  
572 2020;396(10249):479-488. doi: 10.1016/S0140-6736(20)31605-6.
- 573 10. van Doremalen N, Lambe T, Spencer A, et al. ChAdOx1 nCoV-19 vaccine  
574 prevents SARS-CoV-2 pneumonia in rhesus macaques. *Nature*. 2020 Jul 30. doi:  
575 10.1038/s41586-020-2608-y.
- 576 11. Folegatti PM, Ewer KJ, Aley PK, et al. Safety and immunogenicity of the  
577 ChAdOx1 nCoV-19 vaccine against SARS-CoV-2: a preliminary report of a phase  
578 1/2, single-blind, randomised controlled trial. *Lancet*. 2020;396(10249):467-478.  
579 doi: 10.1016/S0140-6736(20)31604-4.
- 580 12. Mercado NB, Zahn R, Wegmann F, et al. Single-shot Ad26 vaccine protects  
581 against SARS-CoV-2 in rhesus macaques. *Nature*. 2020 Jul 30. doi:  
582 10.1038/s41586-020-2607-z.
- 583 13. Tostanoski LH, Wegmann F, Martinot AJ, et al. Ad26 vaccine protects against  
584 SARS-CoV-2 severe clinical disease in hamsters. *Nat Med*. 2020 Sep 3. doi:  
585 10.1038/s41591-020-1070-6.
- 586 14. Sadoff J, Le Gars M, Shukarev G, et al. Safety and immunogenicity of the  
587 Ad26.COV2.S COVID-19 vaccine candidate: interim results of a phase 1/2a,  
588 double-blind, randomized, placebo-controlled trial. *medRxiv*  
589 2020.09.23.20199604; doi: <https://doi.org/10.1101/2020.09.23.20199604>.
- 590 15. Gao Q, Bao L, Mao H, et al. Development of an inactivated vaccine candidate for  
591 SARS-CoV-2. *Science*. 2020;369(6499):77-81. doi: 10.1126/science.abc1932.
- 592 16. Wang H, Zhang Y, Huang B, et al. Development of an Inactivated Vaccine  
593 Candidate, BBIBP-CorV, with Potent Protection against SARS-CoV-2. *Cell*.  
594 2020;182(3):713-721. doi: 10.1016/j.cell.2020.06.008.
- 595 17. Corbett KS, Flynn B, Foulds KE, et al. Evaluation of the mRNA-1273 Vaccine  
596 against SARS-CoV-2 in Nonhuman Primates. *N Engl J Med*. 2020 Jul 28. doi:  
597 10.1056/NEJMoa2024671.
- 598 18. Jackson LA, Anderson EJ, Rouphael NG, et al. An mRNA Vaccine against  
599 SARS-CoV-2 - Preliminary Report. *N Engl J Med*. 2020 Jul 14;NEJMoa2022483.  
600 doi: 10.1056/NEJMoa2022483.
- 601 19. Mulligan MJ, Lyke KE, Kitchin N, et al. Phase 1/2 study of COVID-19 RNA  
602 vaccine BNT162b1 in adults. *Nature*. 2020 Aug 12. doi:  
603 10.1038/s41586-020-2639-4.
- 604 20. Graham SP, McLean RK, Spencer AJ, et al. Evaluation of the immunogenicity of  
605 prime-boost vaccination with the replication-deficient viral vectored COVID-19  
606 vaccine candidate ChAdOx1 nCoV-19. *NPJ Vaccines*. 2020;5:69. doi:  
607 10.1038/s41541-020-00221-3.
- 608 21. Logunov DY, Dolzhikova IV, Zubkova OV, et al. Safety and immunogenicity of  
609 an rAd26 and rAd5 vector-based heterologous prime-boost COVID-19 vaccine in

- 610 two formulations: two open, non-randomised phase 1/2 studies from Russia.  
611 *Lancet*. 2020:S0140-6736(20)31866-3. doi: 10.1016/S0140-6736(20)31866-3.
- 612 22. Luo S, Zhang P, Ma X, et al. A rapid strategy for constructing novel simian  
613 adenovirus vectors with high viral titer and expressing highly antigenic proteins  
614 applicable for vaccine development. *Virus Res*. 2019;268:1-10. doi:  
615 10.1016/j.virusres.2019.05.008.
- 616 23. Luo S, Zhao W, Ma X, et al. A high infectious simian adenovirus type 23 vector  
617 based vaccine efficiently protects common marmosets against Zika virus infection.  
618 *PLoS Negl Trop Dis*. 2020; 14(2): e0008027. doi:10.1371/journal.pntd.0008027.
- 619 24. Amanat F, Krammer F. SARS-CoV-2 Vaccines: Status Report. *Immunity*.  
620 2020;52(4):583-589. doi: 10.1016/j.immuni.2020.03.007.
- 621 25. Kaur SP, Gupta V. COVID-19 Vaccine: A comprehensive status report. *Virus Res*.  
622 2020;288: 198114. doi: 10.1016/j.virusres.2020.198114.
- 623 26. Yu J, Tostanoski LH, Peter L, et al. DNA vaccine protection against SARS-CoV-2  
624 in rhesus macaques. *Science*. 2020;369(6505):806-811. doi:  
625 10.1126/science.abc6284.
- 626 27. Geisbert TW, Bailey M, Hensley L, et al. Recombinant adenovirus serotype 26  
627 (Ad26) and Ad35 vaccine vectors bypass immunity to Ad5 and protect nonhuman  
628 primates against ebolavirus challenge. *J Virol*. 2011;85(9):4222-33. doi:  
629 10.1128/JVI.02407-10.
- 630 28. Tan CW, Chia WN, Qin X, et al. A SARS-CoV-2 surrogate virus neutralization  
631 test based on antibody-mediated blockage of ACE2-spike protein-protein  
632 interaction. *Nat Biotechnol*. 2020 Jul 23. doi: 10.1038/s41587-020-0631-z.
- 633 29. Wang Q, Sun Y, Xu Y, et al. Seroprevalence of Human Adenovirus Type 5  
634 Neutralizing Antibody in Common Marmosets Determined by a New Set of Two  
635 Assays. *Viral Immunol*. 2019;32(8):348-354. doi: 10.1089/vim.2019.0054.

636

637

638 **SUPPLEMENTARY MATERIALS**

639 Fig. S1. Histopathological examination from Sad23L-nCoV-S and Ad49L-nCoV-S

640 vaccines inoculated C57BL/6 mice

641 Fig. S2. Kinetic change of hematological and clinical biochemistry indexes during the

642 course of vaccinated or sham control rhesus macaques

643 Fig. S3. Specific T cell response of splenocytes from C57BL/6 mice (n=5/group)

644 immunized with a single dose of Sad23L-nCoV-S or Ad49L-nCoV-S vaccine

645 Fig. S4. IgG subclass antibodies against RBD protein in sera of C57BL/6 and

646 BALB/c mice immunized by prime only or prime-boost with Sad23L-nCoV-S and

647 Ad49L-nCoV-S vaccines

648 Fig. S5. Frequency of IL-2 expressing CD4<sup>+</sup>/CD8<sup>+</sup> T cell responses of splenocytes

649 from prime-boost immunized C57BL/6 and BALB/c mice with Sad23L-nCoV-S and

650 Ad49L-nCoV-S vaccines

651 Fig. S6. IL-4 secreting T cell response in prime-boost immunized rhesus macaques

652 with Sad23L-nCoV-S and Ad49L-nCoV-S vaccines

653 Fig. S7. Frequency of intracellular TNF $\alpha$  and IL-2 expressing T cell response in

654 PBMCs from rhesus macaques immunized with Sad23L-nCoV-S and Ad49L-nCoV-S

655 vaccines or sham controls

656 Fig. S8. Measurement of serum NAb titers to Ad49L and Sad23L vectors in

657 vaccinated macaques

658 Fig. S9. Examination of SARS-CoV-2 S protein in the tissues of Sad23L-nCoV-S and  
659 Ad49L-nCoV-S immunized mice

660 Table S1. Basic information for rhesus macaques pre-vaccination

661 Table S2: Measuring of hematological and biochemistry indexes of rhesus macaques  
662 in the course of pre- and post-vaccination with Sad23L-nCoV-S and Ad49L-nCoV-S  
663 vaccines

664 Table S3. Peptides derived from amino acid sequences of SARS-CoV-2 S protein  
665 used in ELISpot and ICS

666 Table S4. Nested-PCR primers specific for hexon of Sad23L or Ad49L vector

667



668 **ACKNOWLEDGMENTS**

669 The authors thank professors Kwok-Yung Yuen from The University of Hong Kong  
670 for his assistance for purchasing simian adenoviruses type 23 and human adenovirus  
671 type 49 strains; Dongming Zhou from The Institut Pasteur in Shanghai for his  
672 technical help for construction of adenovirus vectors; Shuwen Liu and Mengfeng Li  
673 from Southern Medical University for the help for pseudovirus neutralization test,  
674 study design and writing of manuscript; Caiping Guo from Shenzhen Weiguang  
675 Biological Products Co., Ltd for her helpful suggestion on identification of vaccine  
676 strains. The authors also thank The First People's Hospital of Foshan, Shenzhen and  
677 Guangzhou CDC for providing COVID-19 patients' serum samples; Shenzhen,  
678 Guangzhou, Yichang, Harbin, Chengdu and Xian Blood Centers for providing plasma  
679 samples of blood donors.

680 **Funding**

681 This work was financially supported by Guangzhou Bai Rui Kang (BRK) Biological  
682 Science and Technology Limited Company, China.

683 **Author contributions**

684 C.L., L.S., T.L. and Y.Z. designed the research. L.S., P.Z., B.L., C.Y., C.L.L., Q.W.,  
685 L.Z. and T.L. carried out the experiments. X.T., J.L., S.H., J.Z. and Y.F. provided  
686 COVID-19 patient or healthy blood donor samples. S.L., C.L., Y.Z. and J.P.A.  
687 analyzed data and wrote the paper.

688 **Competing interests:** S.L., P.Z., B.L., and C.L.L. were partly sponsored by BRK

689 company. All other authors declare that they have no competing interests.

690 **Data and materials availability**

691 All data associated with this paper can be found in the main text or the supplementary

692 materials. Two novel adenoviral vectors (Sad23L and Ad49L) are available under a

693 material transfer agreement with BRK upon request to the corresponding author.

694 **Figures and legends**

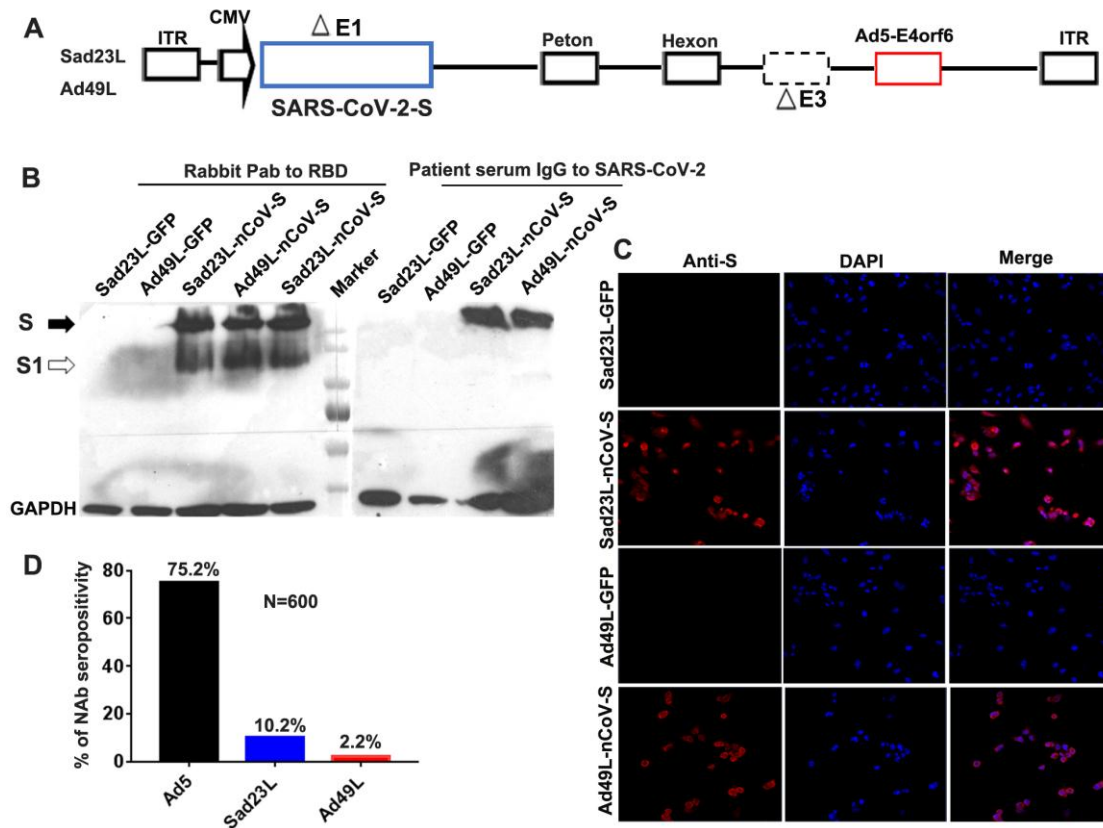

695

696 **Fig 1. Characterization of Sad23L-nCoV-S and Ad49L-nCoV-S vaccines.** (A)

697 Recombinant adenovirus constructs Sad23L-nCoV-S and Ad49L-nCoV-S carrying

698 the full-length S gene of SARS-CoV-2 under CMV promotor regulation within the

699 deleted E1 region of Sad23L or Ad49L vector. (B) Western blot analysis for the

700 expression of S protein from Sad23L-nCoV-S or Ad49L-nCoV-S infected HEK-293A

701 cell lysates by rabbit polyclonal antibody to RBD and heat-inactivated COVID-19

702 patent's serum IgG. Sad23L-GFP or Ad49L-GFP virus infected cells were used as

703 mock controls. (C) Expression of S protein in HEK-293A cells detected by

704 immunofluorescence staining. (D) Seroprevalence of neutralizing antibody to Ad5,

705 Ad49L or Sad23L vector in 600 healthy blood donors.

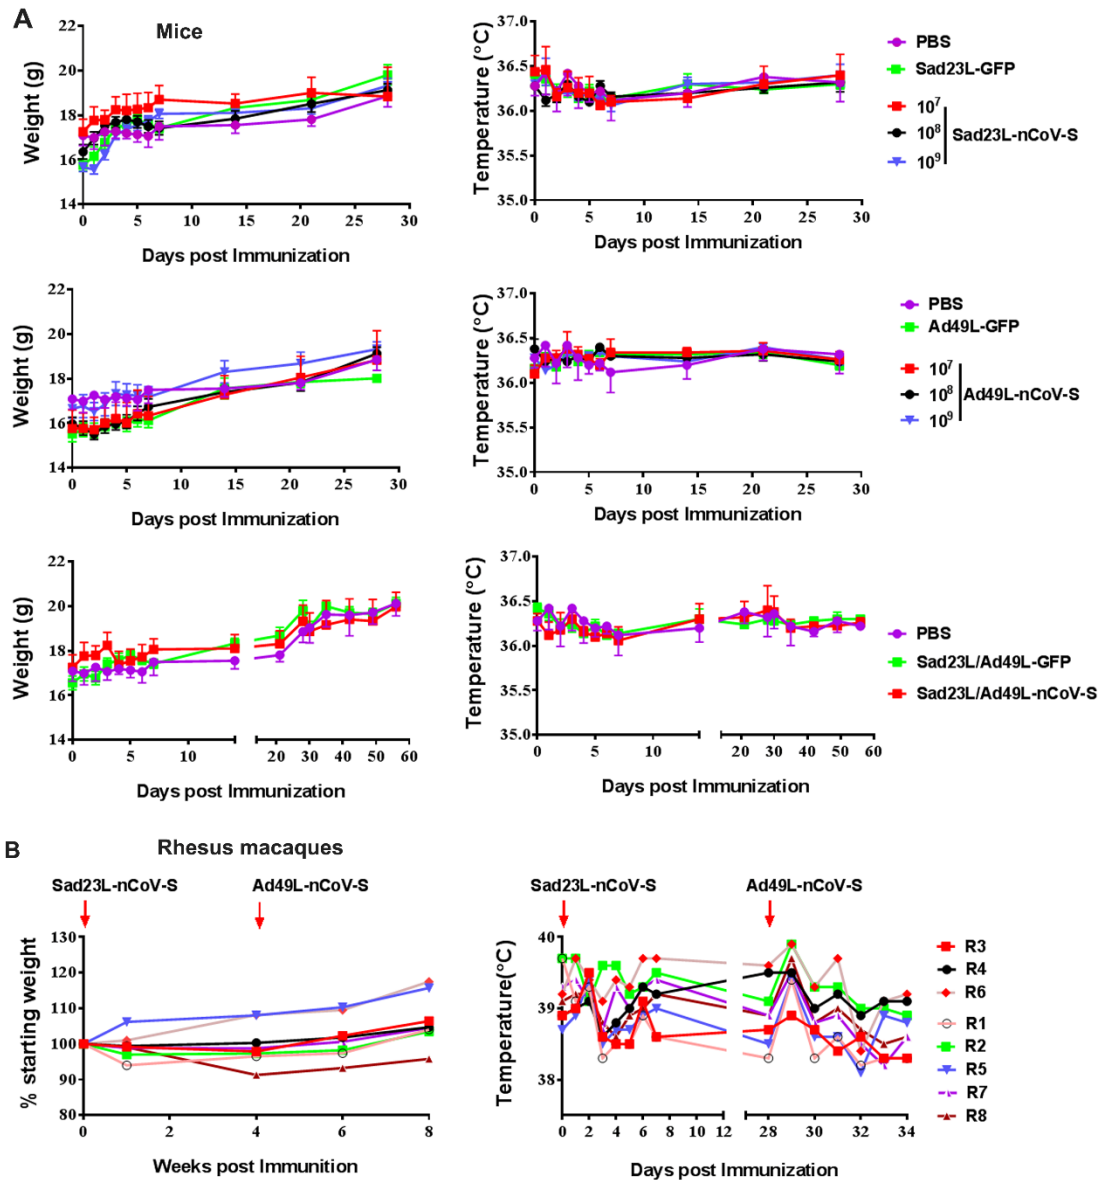

706

707 **Fig. 2. Examination of weight and body temperature of mice and rhesus**  
 708 **macaques inoculated with Sad23L-nCoV-S and Ad49L-nCoV-S vaccines.**

709 Animals were intramuscularly immunized by prime only with either Sad23L-nCoV-S  
 710 or Ad49L-nCoV-S vaccine at three different doses, or by prime-boost with first  
 711 Sad23L-nCoV-S and boost with Ad49L-nCoV-S vaccines at 4 week interval. Body  
 712 weight and temperature were monitored during the course up to 60 days for mice or 8  
 713 weeks for monkeys. (A) C57BL/6 mice (n=5/group) immunized with a dose of 10<sup>7</sup>,  
 714 10<sup>8</sup> or 10<sup>9</sup> PFU Sad23L-nCoV-S vaccine, 10<sup>9</sup> PFU Sad23L-GFP and an equal volume  
 715 of PBS controls (top panel); a dose of 10<sup>7</sup>, 10<sup>8</sup> or 10<sup>9</sup> PFU Ad49L-nCoV-S vaccine,  
 716 10<sup>9</sup> PFU Ad49L-GFP and an equal volume of PBS controls (middle panel); a dose of

717  $10^9$  PFU Sad23L-nCoV-S followed by a dose of  $10^9$  PFU Ad49L-nCoV-S, or  $10^9$  PFU  
718 Sad23L-GFP and  $10^9$  PFU Ad49L-GFP vectorial viruses and an equal volume of PBS  
719 controls (low panel). **(B)** Rhesus monkeys (11-14y) inoculated with a dose of  $5 \times 10^9$   
720 PFU Sad23L-nCoV-S and a dose of  $5 \times 10^9$  PFU Ad49L-nCoV-S vaccines (R1, R2, R5,  
721 R7 and R8), or  $5 \times 10^9$  PFU Sad23L-GFP and a dose of  $5 \times 10^9$  PFU Ad49L-GFP  
722 controls (R3, R4 and R6).  
723

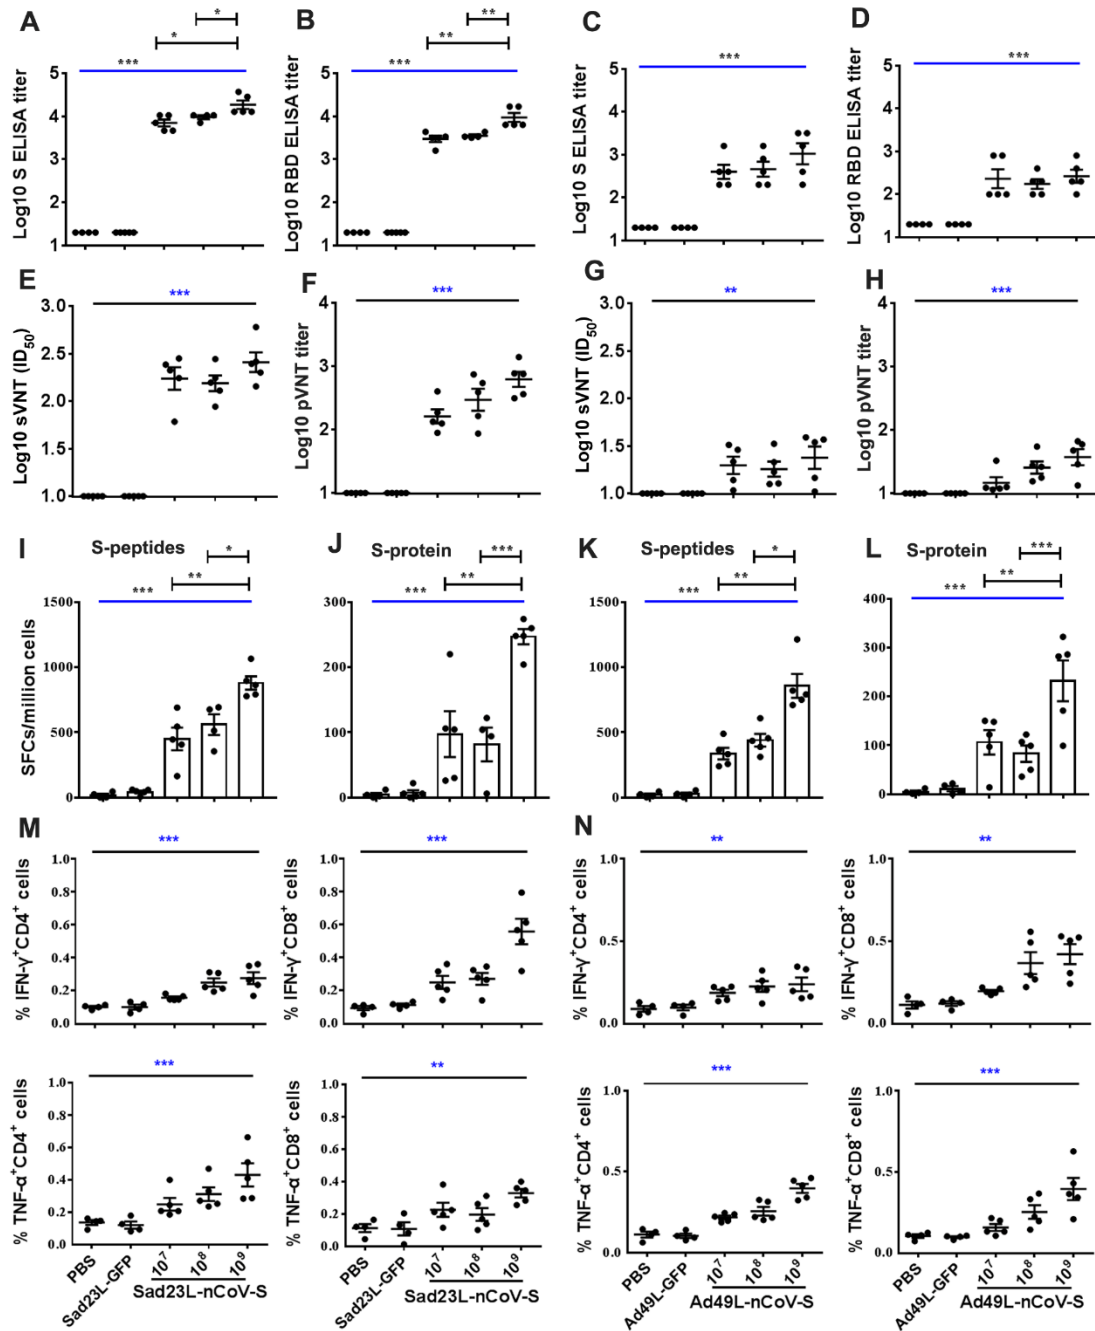

724

725 **Fig 3. Specific antibody and T cell response of C57BL/6 mice inoculated with a**  
 726 **single shot of Sad23L-nCoV-S or Ad49L-nCoV-S vaccine at three different doses.**

727 C57BL/6 mice (n=5/group) were immunized by a single dose of 10<sup>7</sup>, 10<sup>8</sup> or 10<sup>9</sup> PFU  
 728 Sad23L-nCoV-S or Ad49L-nCoV-S vaccine. Mice sera and splenocytes were  
 729 collected for measurement of antibody level and T cell response 4 weeks  
 730 post-immunization. (A-D) S or RBD binding antibody (S-BAb or RBD-BAb) titers  
 731 were obtained by ELISA. (E-H) Neutralizing antibody (NAb) titers were obtained by  
 732 surrogate virus-based neutralization test (sVNT) or pseudovirus-based neutralization

733 test (pVNT). **(I-L)** IFN- $\gamma$  secreting T cell response (spot forming cells [SFCs]/million  
734 cells) of splenocytes to S peptides and S protein from Sad23L-nCoV-S or  
735 Ad49L-nCoV-S immunized mice was measured by ELISpot, respectively. **(M and N)**  
736 Frequency of IFN- $\gamma$  or TNF- $\alpha$  expressing CD4<sup>+</sup> and CD8<sup>+</sup> T cell response of  
737 splenocytes to S peptides from Sad23L-nCoV-S or Ad49L-nCoV-S immunized mice  
738 was obtained by ICS. Data is shown as mean  $\pm$  SEM (standard errors of means). *P*  
739 values are analyzed by one-way ANOVA with 2-fold Bonferroni adjustment.  
740 Statistically significant differences are shown with asterisks (\*, *P*<0.05; \*\*, *P*< 0.01  
741 and \*\*\*, *P*< 0.001).

742

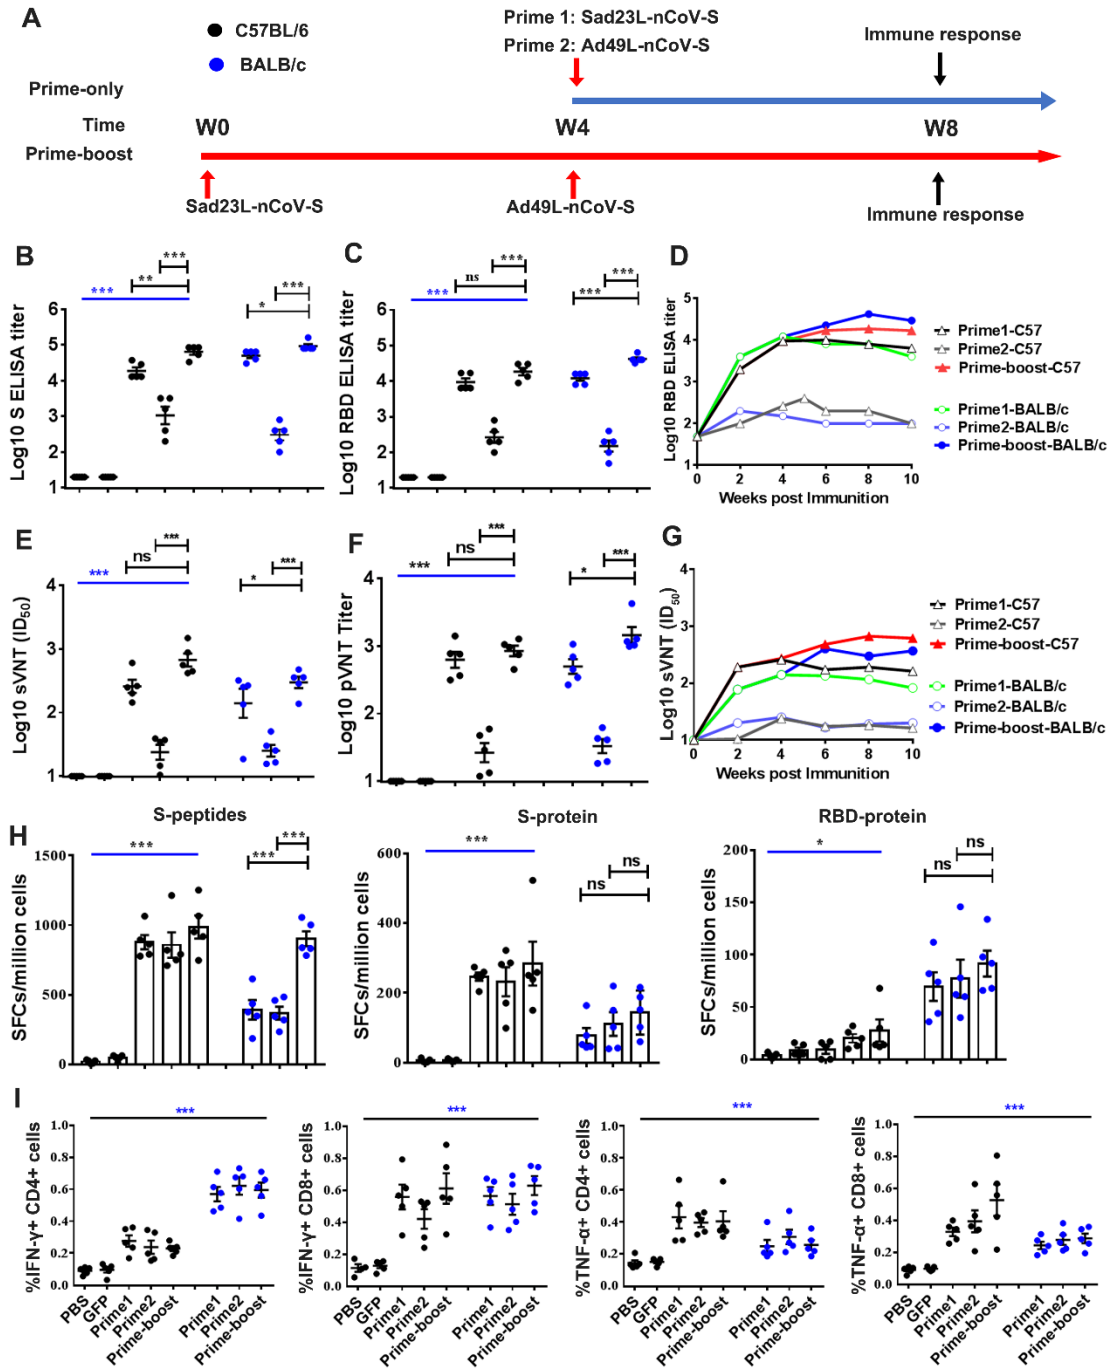

743

744 **Fig. 4. Specific humoral and cellular immune response of C57BL/6 and BALB/c**

745 **mice to prime-boost immunization with Sad23L-nCoV-S and Ad49L-nCoV-S**

746 **vaccines. (A)** C57BL/6 and BALB/c mice (n=5/group) were prime immunized with a

747 dose of 10<sup>9</sup> PFU Sad23L-nCoV-S vaccine and boosted with a dose of 10<sup>9</sup> PFU

748 Ad49L-nCoV-S vaccine at 4 week interval. Sera and splenocytes were collected from

749 vaccinated or control mice for measurement of antibody and T cell responses 4 weeks

750 after both prime only and boosting immunizations. **(B-D)** Anti-S-BAb and RBD-BAb



751 titers determined by ELISA. **(E-G)** NAb titers measured by sVNT and pVNT. **(H)**  
752 IFN- $\gamma$  secreting T cell response (SFCs/million cells) to S peptides, S or RBD protein  
753 measured by ELISpot. **(I)** Frequency of IFN- $\gamma$  or TNF- $\alpha$  expressing CD4<sup>+</sup> and CD8<sup>+</sup>  
754 T cell response to S peptides determined by ICS. Data are shown as a mean  $\pm$  SEM. *P*  
755 values are analyzed with two-tailed t test. Statistically significant differences are  
756 shown with asterisks (\*, *P*<0.05; \*\*, *P*< 0.01 and \*\*\*, *P*< 0.001).  
757

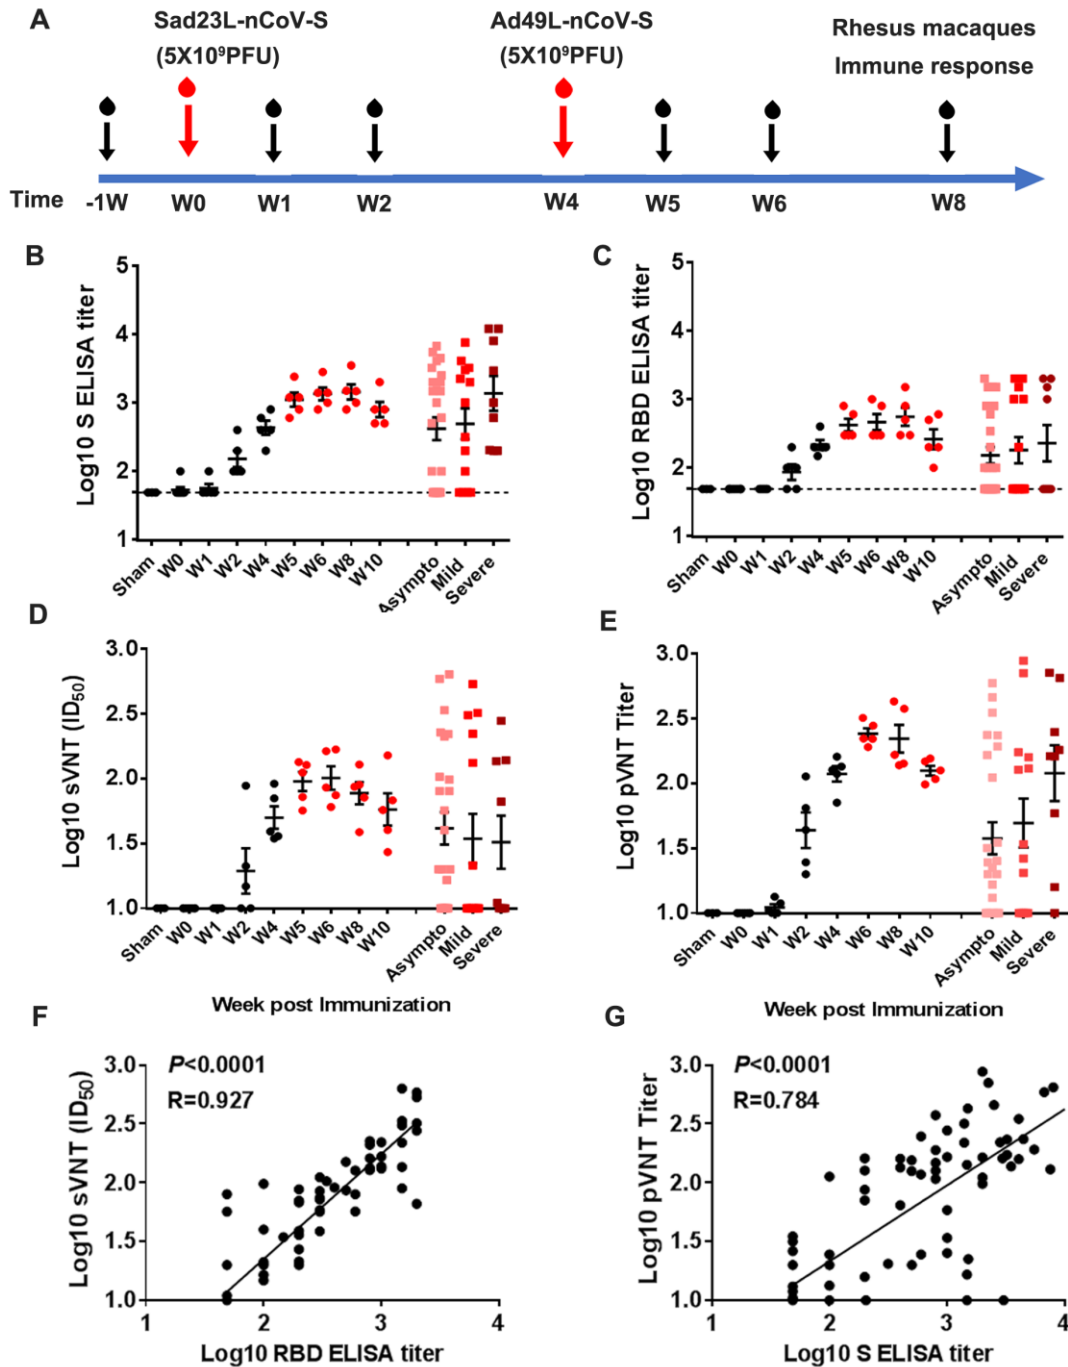

758

759 **Fig. 5. Antibody reactivity of Rhesus macaques to prime-boost vaccination with**

760 **Sad23L-nCoV-S and Ad49L-nCoV-S vaccines. (A) Five rhesus macaques were**

761 **prime immunized with 5×10<sup>9</sup> PFU of Sad23L-nCoV-S vaccine and boosted with**

762 **5×10<sup>9</sup> PFU of Ad49L-nCoV-S vaccine at 4 week interval. Blood samples were**

763 **collected weekly from immunized or sham control macaques. Three macaques first**

764 **immunized with 5×10<sup>9</sup> PFU of Sad23L-GFP viruses and boosted with 5×10<sup>9</sup> PFU of**

765 **Ad49L-GFP viruses were used as sham controls. Convalescent serum samples from**

766 25 asymptomatic, 14 mild and 9 severe COVID-19 infected patients were taken as  
767 positive controls. **(B and C)** S-BAb and RBD-BAb titers were tested by ELISA. **(D**  
768 **and E)** NAb titers were measured by sVNT and pVNT. **(F and G)** Correlation  
769 between RBD-BAb and sVNT or S-BAb and pVNT assay were compared using  
770 Spearman nonparametric correlation, respectively.  
771

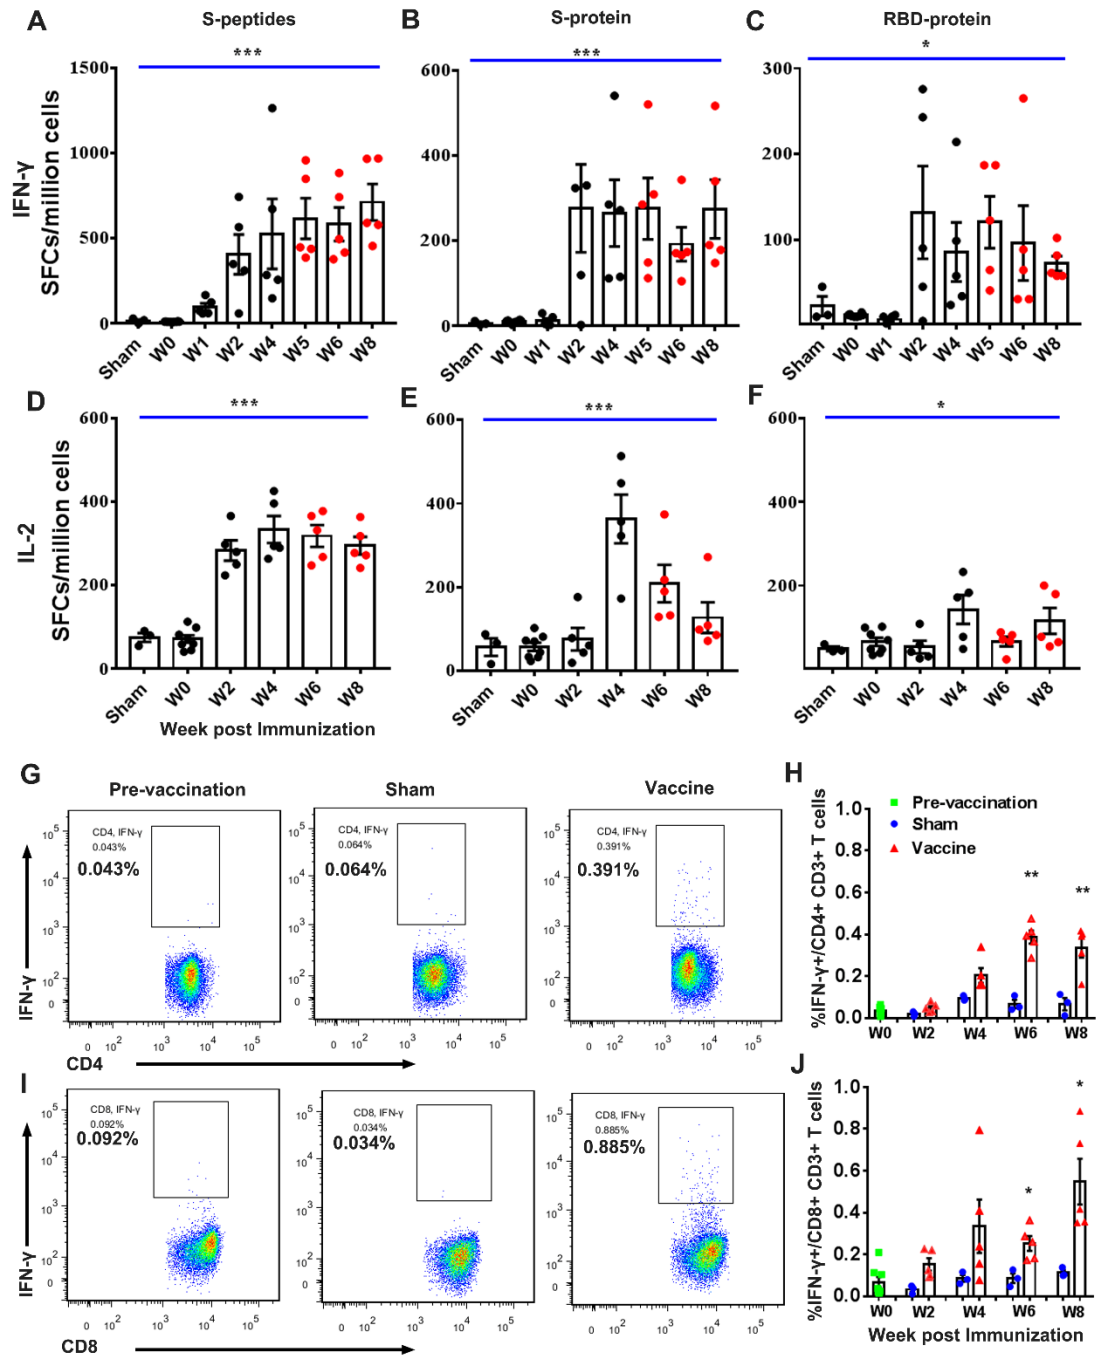

772

773 **Fig. 6. Specific T cell response of PBMCs from Rhesus macaques immunized**  
 774 **with Sad23L-nCoV-S and Ad49L-nCoV-S vaccines or sham controls by**  
 775 **prime-boost vaccination regimen. (A-C) IFN- $\gamma$  or (D-F) IL-2 secreting T cell**  
 776 **response (SFCs/million cells) to S peptides, S or RBD protein was measured by**  
 777 **ELISpot. (G-J) Frequency of intracellular IFN- $\gamma$  expressing CD4<sup>+</sup>/CD8<sup>+</sup> T cell**  
 778 **responses to S peptides was determined by ICS, respectively. Data are shown as mean**

779  $\pm$  SEM. P values are calculated with two-tailed t test. Statistically significant  
780 differences are shown with asterisks (\*,  $P < 0.05$ ; \*\*,  $P < 0.01$  and \*\*\*,  $P < 0.001$ ).

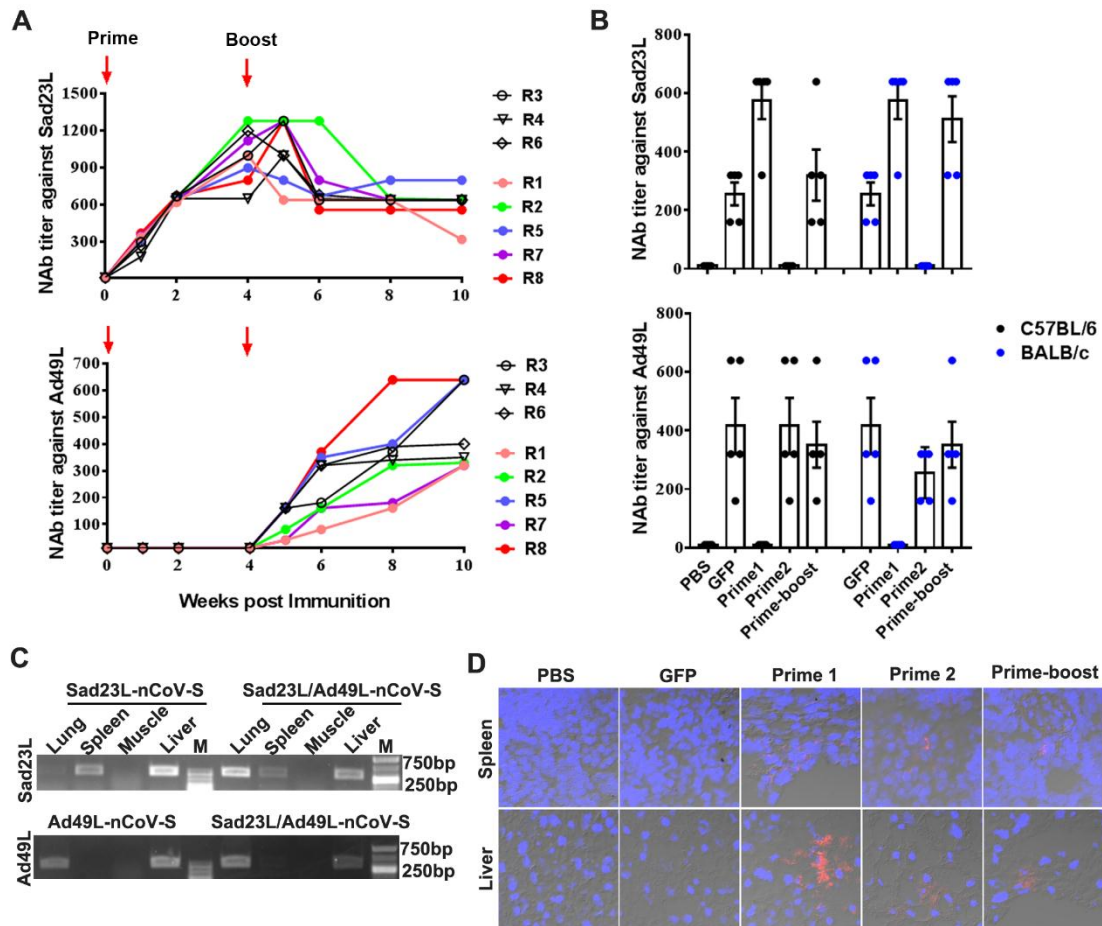

781

782 **Fig 7. Biodistribution of Sad23L-nCoV-S and Ad49L-nCoV-S vaccines in**

783 **inoculated animals. (A)** Serum NAb titers to Sad23L and Ad49L vectors were

784 measured in macaques immunized by prime-boost inoculation with two vaccines at 4

785 week interval, or **(B)** in C57BL/6 and BALB/c mice 4 weeks post prime only or

786 prime-boost vaccination with two vaccines or vectorial controls. **(C)** Nested-PCR

787 amplification of Sad23L or Ad49L-hexon gene (500bp) in tissues of C57BL/6 mice 4

788 weeks after inoculation by prime only or prime-boost immunization with

789 Sad23L-nCoV-S and Ad49L-nCoV-S vaccines. **(D)** Expression of S protein in

790 splenocytes and hepatocytes of tissue frozen sections from vaccine immunized or

791 control C57BL/6 mice by immunofluorescence staining with a human monoclonal

792 antibody to SARS-CoV-2 S and DAPI.

## Supplementary Materials

### Prime-boost vaccination of mice and Rhesus macaques with two novel adenovirus vectored COVID-19 vaccine candidates

#### The PDF file includes

Fig. S1. Histopathological examination from Sad23L-nCoV-S and Ad49L-nCoV-S vaccines inoculated C57BL/6 mice

Fig. S2. Kinetic change of hematological and clinical biochemistry indexes during the course of vaccinated or sham control rhesus macaques

Fig. S3. Specific T cell response of splenocytes from C57BL/6 mice (n=5/group) immunized with a single dose of Sad23L-nCoV-S or Ad49L-nCoV-S vaccine

Fig. S4. IgG subclass antibodies against RBD protein in sera of C57BL/6 and BALB/c mice immunized by prime only or prime-boost with Sad23L-nCoV-S and Ad49L-nCoV-S vaccines

Fig. S5. Frequency of IL-2 expressing CD4<sup>+</sup>/CD8<sup>+</sup> T cell responses of splenocytes from prime-boost immunized C57BL/6 and BALB/c mice with Sad23L-nCoV-S and Ad49L-nCoV-S vaccines

Fig. S6. IL-4 secreting T cell response in prime-boost immunized rhesus macaques with Sad23L-nCoV-S and Ad49L-nCoV-S vaccines

Fig. S7. Frequency of intracellular TNF $\alpha$  and IL-2 expressing T cell response in PBMCs from rhesus macaques immunized with Sad23L-nCoV-S and Ad49L-nCoV-S vaccines or sham controls

Fig. S8. Measurement of serum NAb titers to Ad49L and Sad23L vectors in vaccinated macaques

Fig. S9. Examination of SARS-CoV-2 S protein in the tissues of Sad23L-nCoV-S and Ad49L-nCoV-S immunized mice

Table S1. Basic information for rhesus macaques pre-vaccination

Table S2: Measuring of hematological and biochemistry indexes of rhesus macaques in the course of pre- and post-vaccination with Sad23L-nCoV-S and Ad49L-nCoV-S vaccines

Table S3. Peptides derived from amino acid sequences of SARS-CoV-2 S protein used in ELISpot and ICS

Table S4. Nested-PCR primers specific for hexon of Sad23L or Ad49L vector



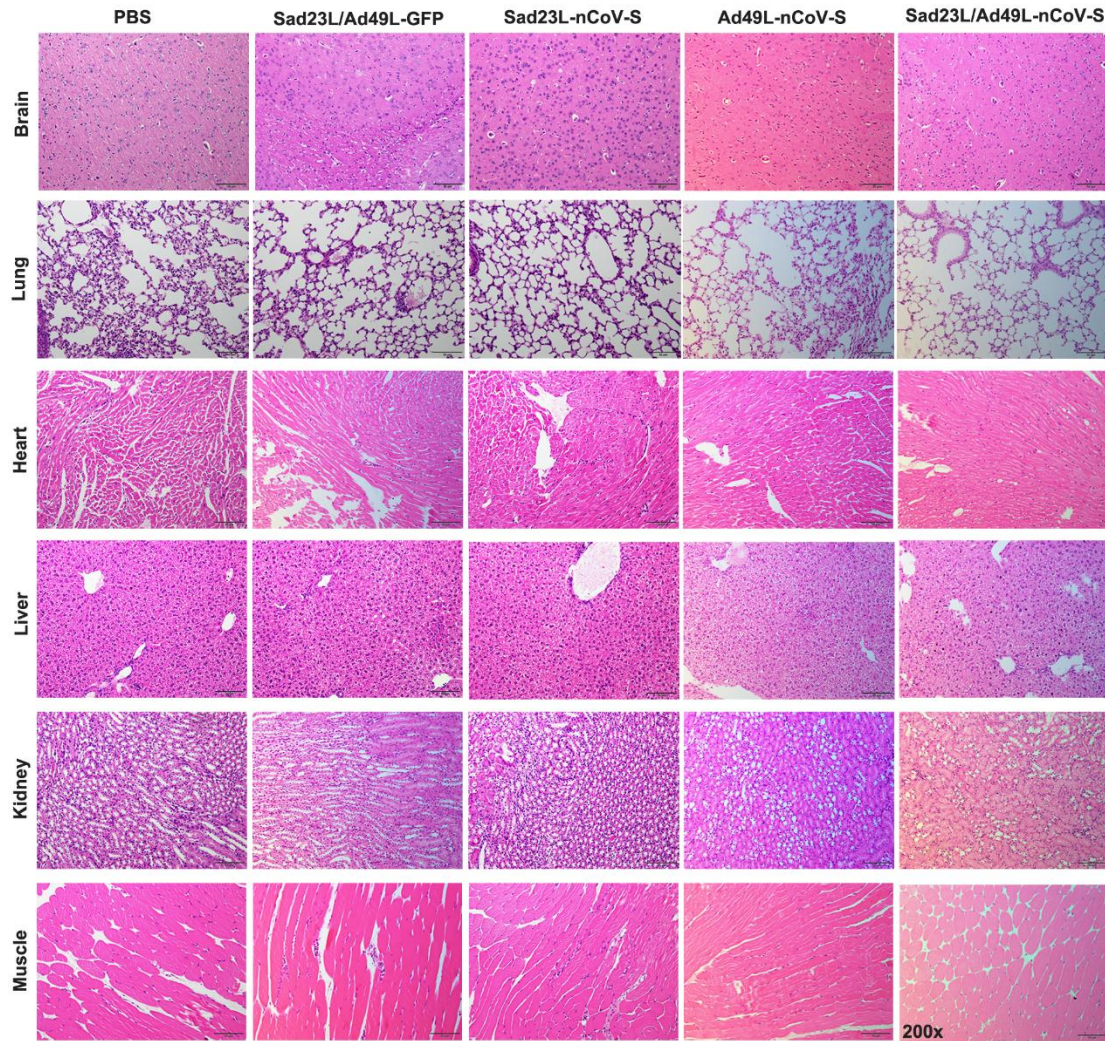

**Fig. S1. Histopathological examination from Sad23L-nCoV-S and Ad49L-nCoV-S vaccines inoculated C57BL/6 mice.** Histopathological examination was carried out for brain, lung, heart, liver, kidney and muscle tissues (at intramuscular injection site and para-tissues) of mice in 4 weeks post prime only or prime-boost immunization with these two vaccines. Tissues were stained with hematoxylin and eosin.

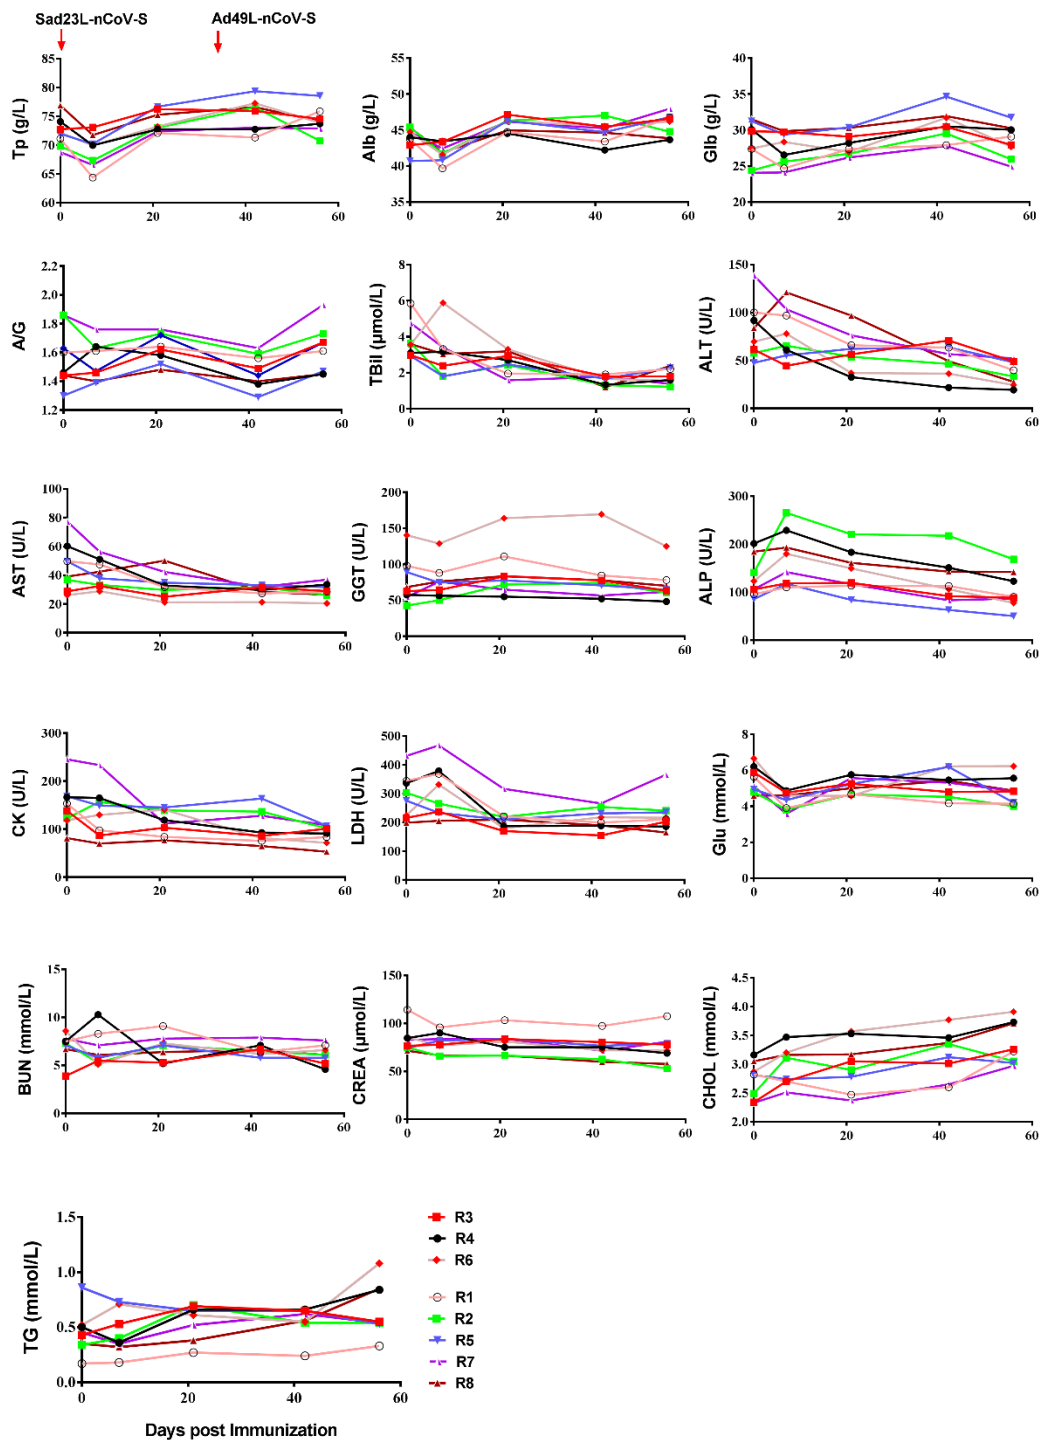

**Fig. S2. Kinetic change of hematological and clinical biochemistry indexes during the course of vaccinated or sham control rhesus macaques.** Rhesus macaques were intramuscularly inoculated by prime-boost immunization with Sad23L-nCoV-S and Ad49L-nCoV-S vaccines at an interval of 4 weeks. A panel of

hematological and biochemical indexes were measured from blood samples at different time points. TP, Total protein; Alb, Albumin; Glb, Globulin; A/G, Albumin/globulin ratio; TBil, Total bilirubin; ALT, Alanine aminotransferase; AST, Aspartate aminotransferase; GGT,  $\gamma$ -glutamyltranspeptidase; ALP, Alkaline phosphatase; CK, Creatine kinase; LDH, Lactate dehydrogenase; Glu, Glucose; BUN, Blood urea nitrogen; CREA, Creatinine; CHOL, Total cholesterol; TG, Triglycerides. R1-R8 indicate rhesus macaques.

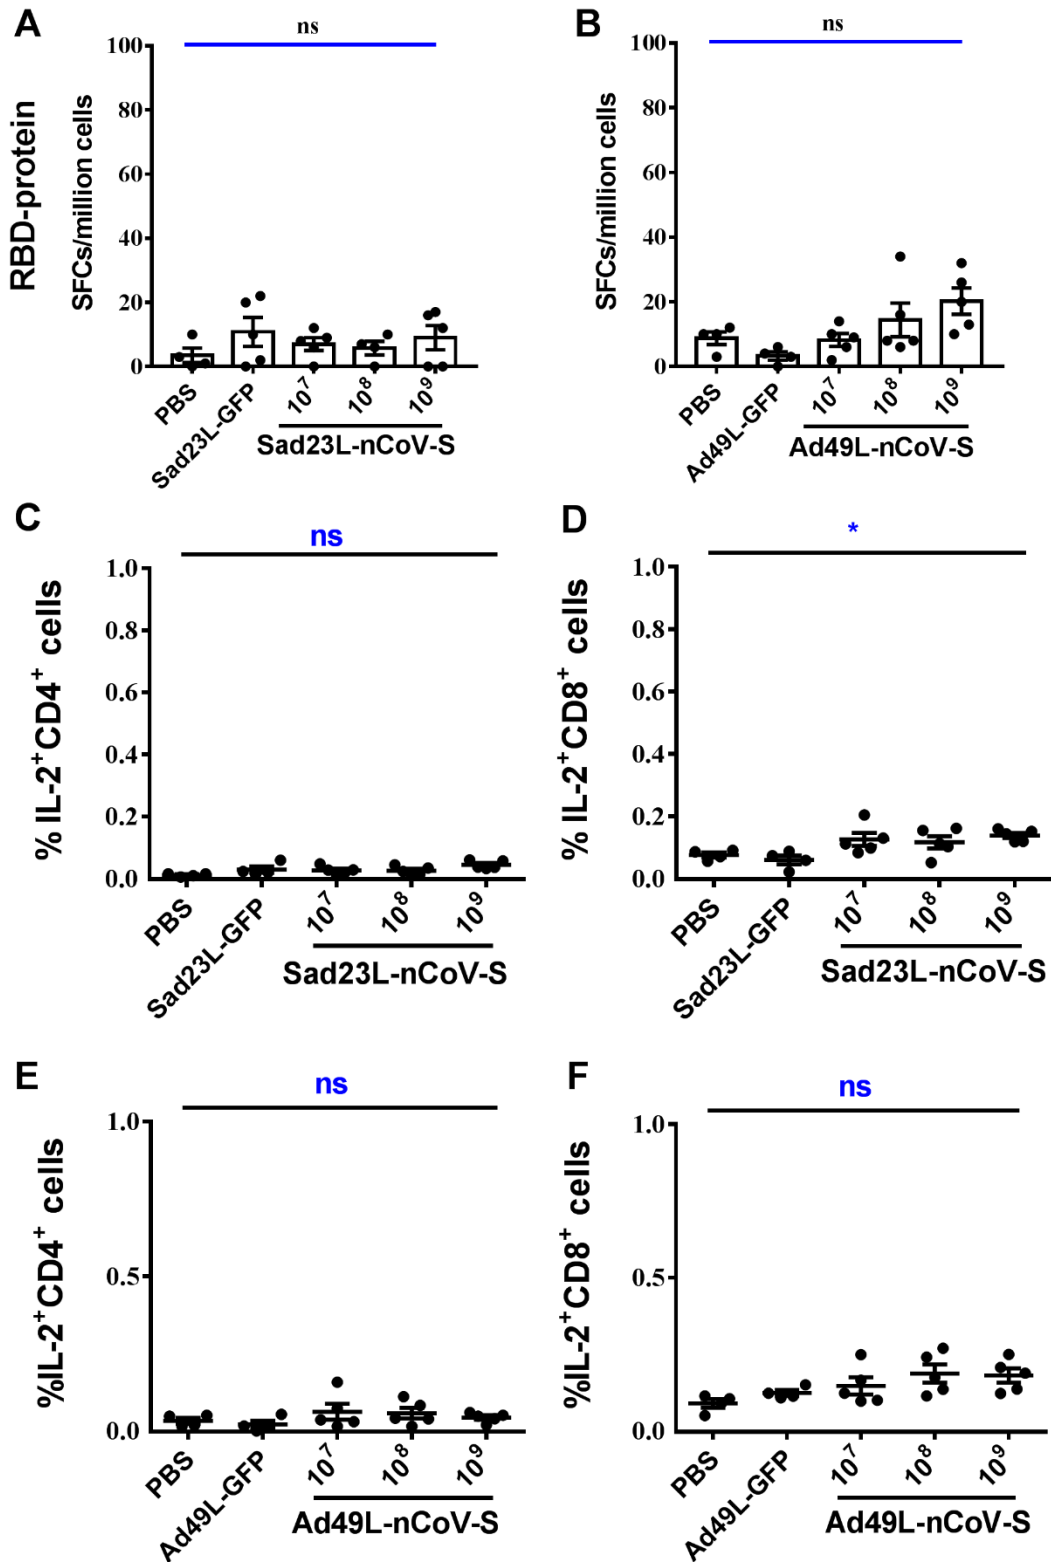

Fig. S3. Specific T cell response of splenocytes from C57BL/6 mice (n=5/group) immunized with a single dose of Sad23L-nCoV-S or Ad49L-nCoV-S vaccine. (A

and **B**) Specific IFN- $\gamma$  secreting T cell response (spot forming cells [SFCs] per million cells) to RBD protein was measured by ELISpot, respectively. (**C** and **D**) Frequency of IL-2<sup>+</sup> CD4<sup>+</sup> or CD8<sup>+</sup> T cell response to S peptides from mice elicited by Sad23L-nCoV-S vaccines was measured by ICS, respectively. (**E** and **F**) Frequency of IL-2<sup>+</sup> CD4<sup>+</sup> or CD8<sup>+</sup> T cell response to S peptides from mice immunized by Ad49L-nCoV-S vaccines was measured by ICS, respectively. Data were shown as means  $\pm$  SEM (standard errors of means). *P* values were analyzed by one-way ANOVA with 2-fold Bonferroni's test. Statically significant differences were showed with asterisks (\*, *P*<0.05; \*\*, *P*< 0.01 and \*\*\*, *P*< 0.001). ns, *P*>0.05 and no significant difference.

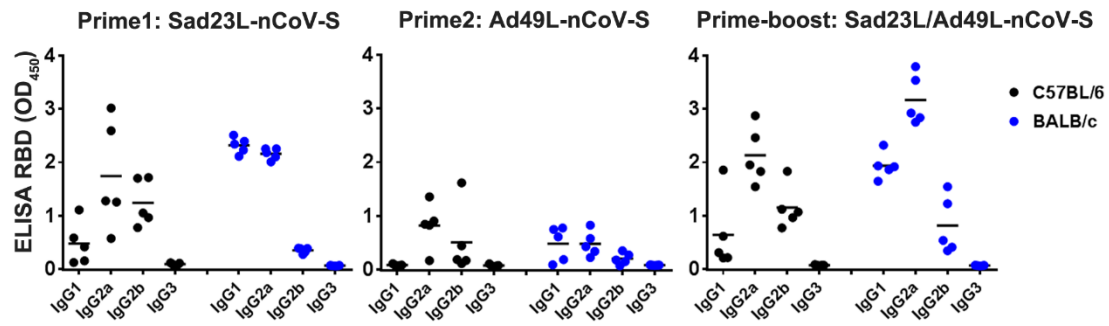

**Fig. S4. IgG subclass antibodies against RBD protein in sera of C57BL/6 and BALB/c mice immunized by prime only or prime-boost with Sad23L-nCoV-S and Ad49L-nCoV-S vaccines.** The sera were collected 4 weeks post prime only or prime-boost immunized C57BL/6 and BALB/c mice. IgG subclass antibodies in sera were detected against RBD protein by ELISA with secondary antibody-HRP conjugate specific to mouse IgG subclass.

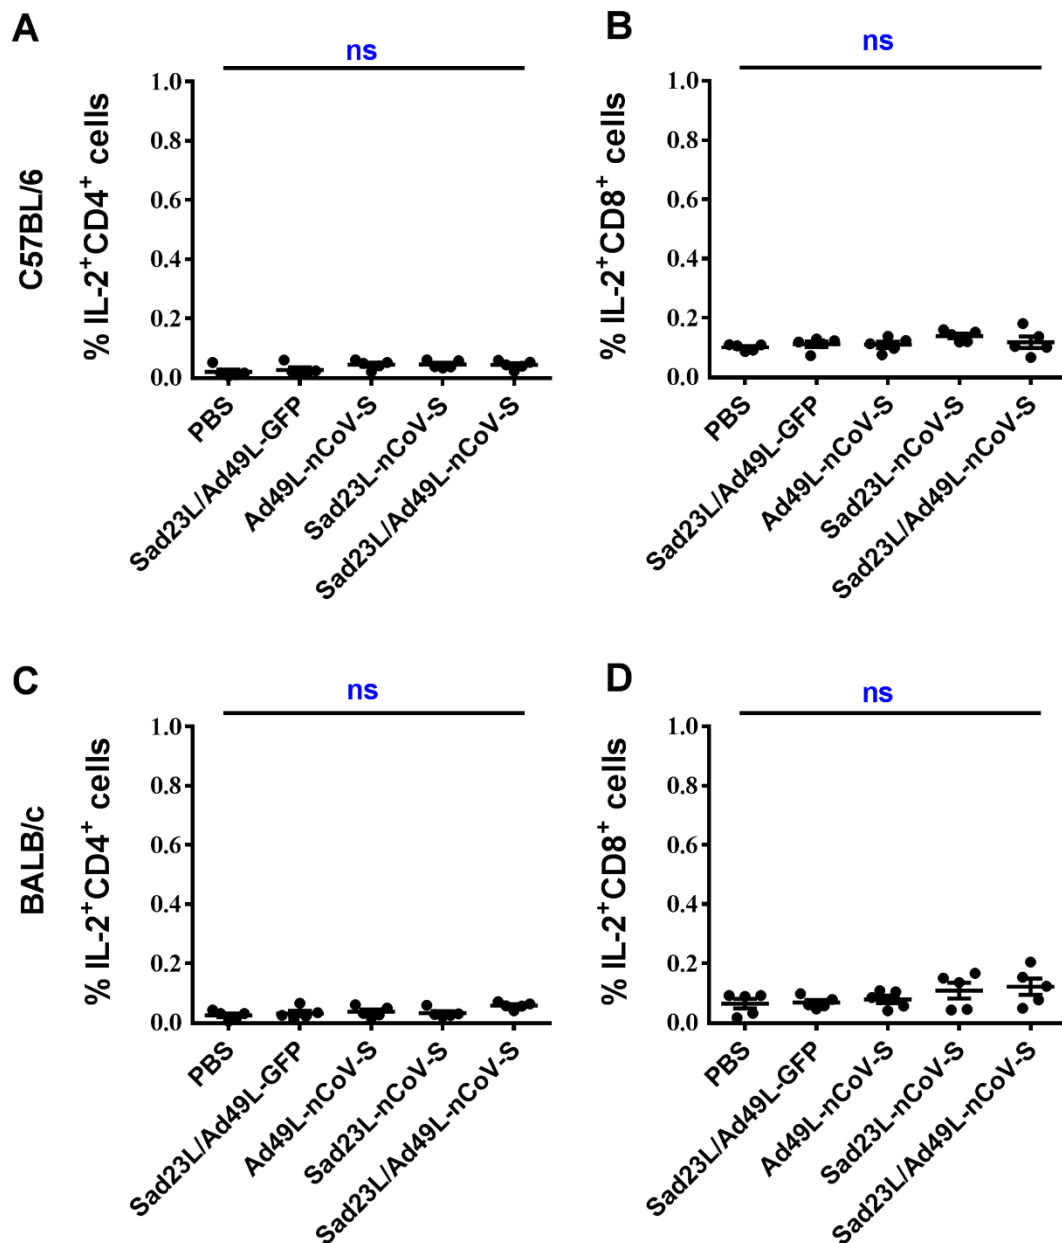

**Fig. S5.** Frequency of IL-2 expressing CD4<sup>+</sup>/CD8<sup>+</sup> T cell responses of splenocytes from prime-boost immunized C57BL/6 and BALB/c mice with Sad23L-nCoV-S and Ad49L-nCoV-S vaccines. (A and B) Frequency of IL-2<sup>+</sup> CD4<sup>+</sup> or CD8<sup>+</sup> T cell responses of splenocytes to S peptides from C57BL/6, or (C and D) from BALB/c mice. Data were shown as means ± SEM (standard errors of means). *P* values were analyzed by one-way ANOVA. ns, *P*>0.05 and no significant difference.

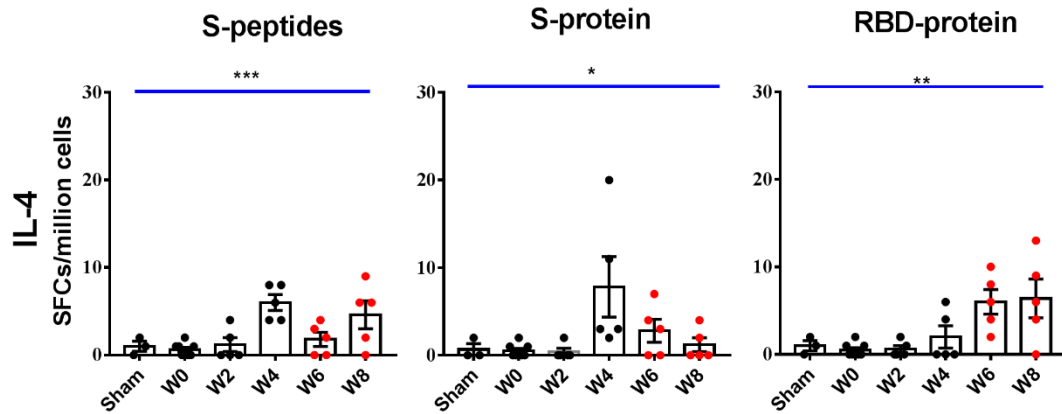

**Fig. S6. IL-4 secreting T cell response in prime-boost immunized rhesus macaques with Sad23L-nCoV-S and Ad49L-nCoV-S vaccines.** The number of specific IL-4 secreting T cells (SFCs/million cells) to S peptides, S or RBD protein in PBMCs of monkeys was measured by ELISpot, respectively. Data were shown as means  $\pm$  SEM (standard errors of means). *P* values were analyzed by one-way ANOVA with 2-fold Bonferroni's test. Statically significant differences were showed with asterisks (\*,  $P < 0.05$ ; \*\*,  $P < 0.01$  and \*\*\*,  $P < 0.001$ ). ns,  $P > 0.05$  and no significant difference.



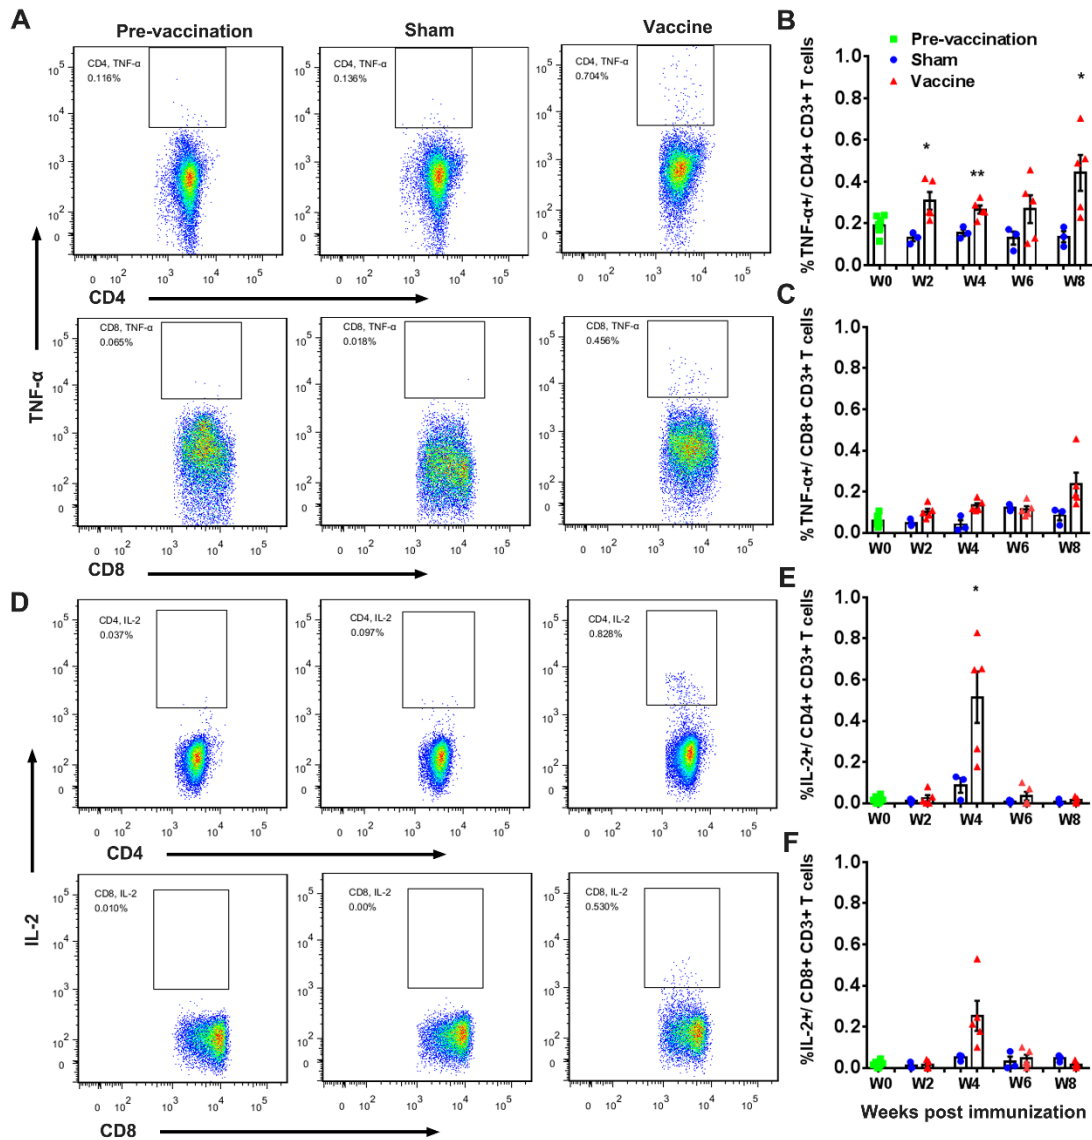

**Fig. S7. Frequency of intracellular TNF $\alpha$  and IL-2 expressing T cell response in PBMCs from rhesus macaques immunized with Sad23L-nCoV-S and Ad49L-nCoV-S vaccines or sham controls. (A-C) Frequency of TNF- $\alpha$ <sup>+</sup> CD4<sup>+</sup>/CD8<sup>+</sup> T cell response to S peptides. (D-F) Frequency of TNF- $\alpha$ <sup>+</sup> CD4<sup>+</sup>/CD8<sup>+</sup> T cell response to S peptides. Data were shown as means  $\pm$  SEM (standard errors of means). *P* values were analyzed by Student's *t* test. Statically significant differences were showed with asterisks (\*, *P* < 0.05; \*\*, *P* < 0.01 and \*\*\*, *P* < 0.001). ns, *P* > 0.05 and no significant difference.**

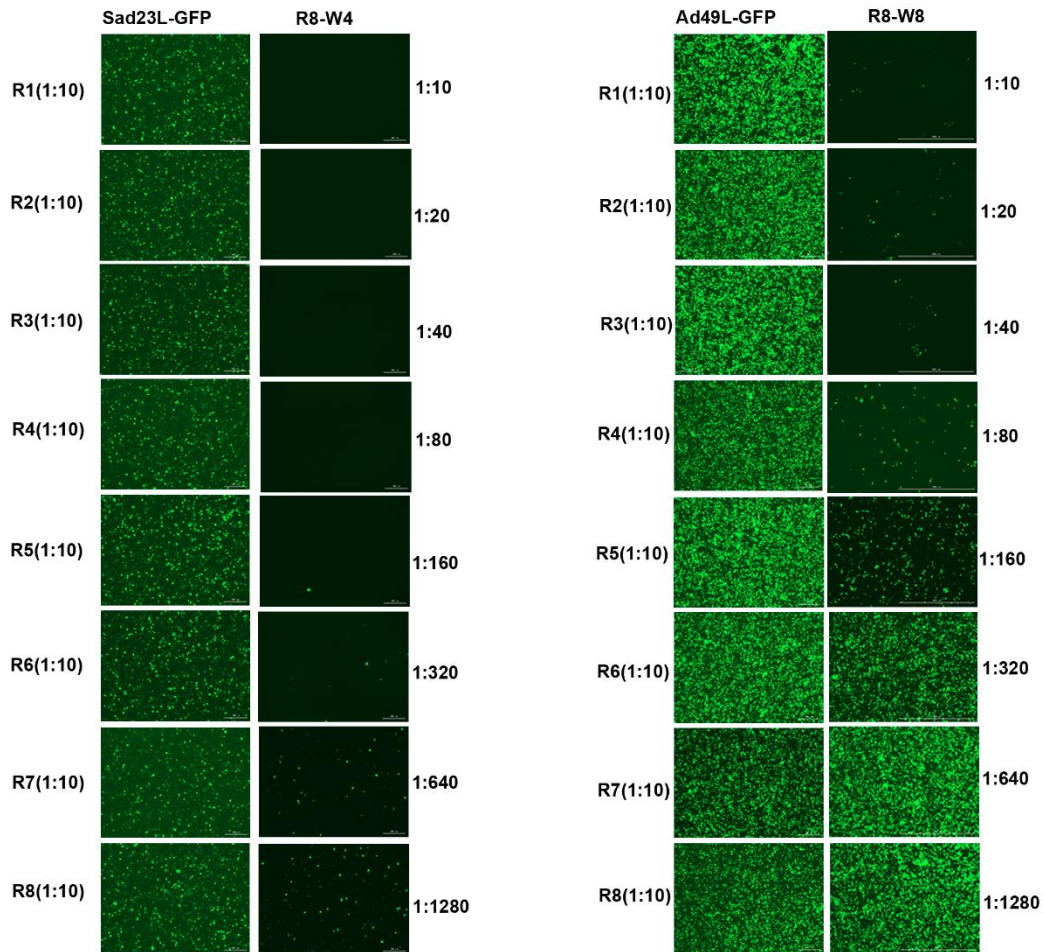

**Fig. S8. Measurement of serum NAb titers to Ad49L and Sad23L vectors in vaccinated macaques.** Two representative plasma samples of vaccinated macaque (R8 at weeks 4 and 8) were tested on HEK-293A cells for neutralizing Sad23L-GFP and Ad49L-GFP vectorial viruses by green fluorescent activity assay. Neutralization titer was defined as the maximum serum dilution that neutralized 50% of Green fluorescent activity.

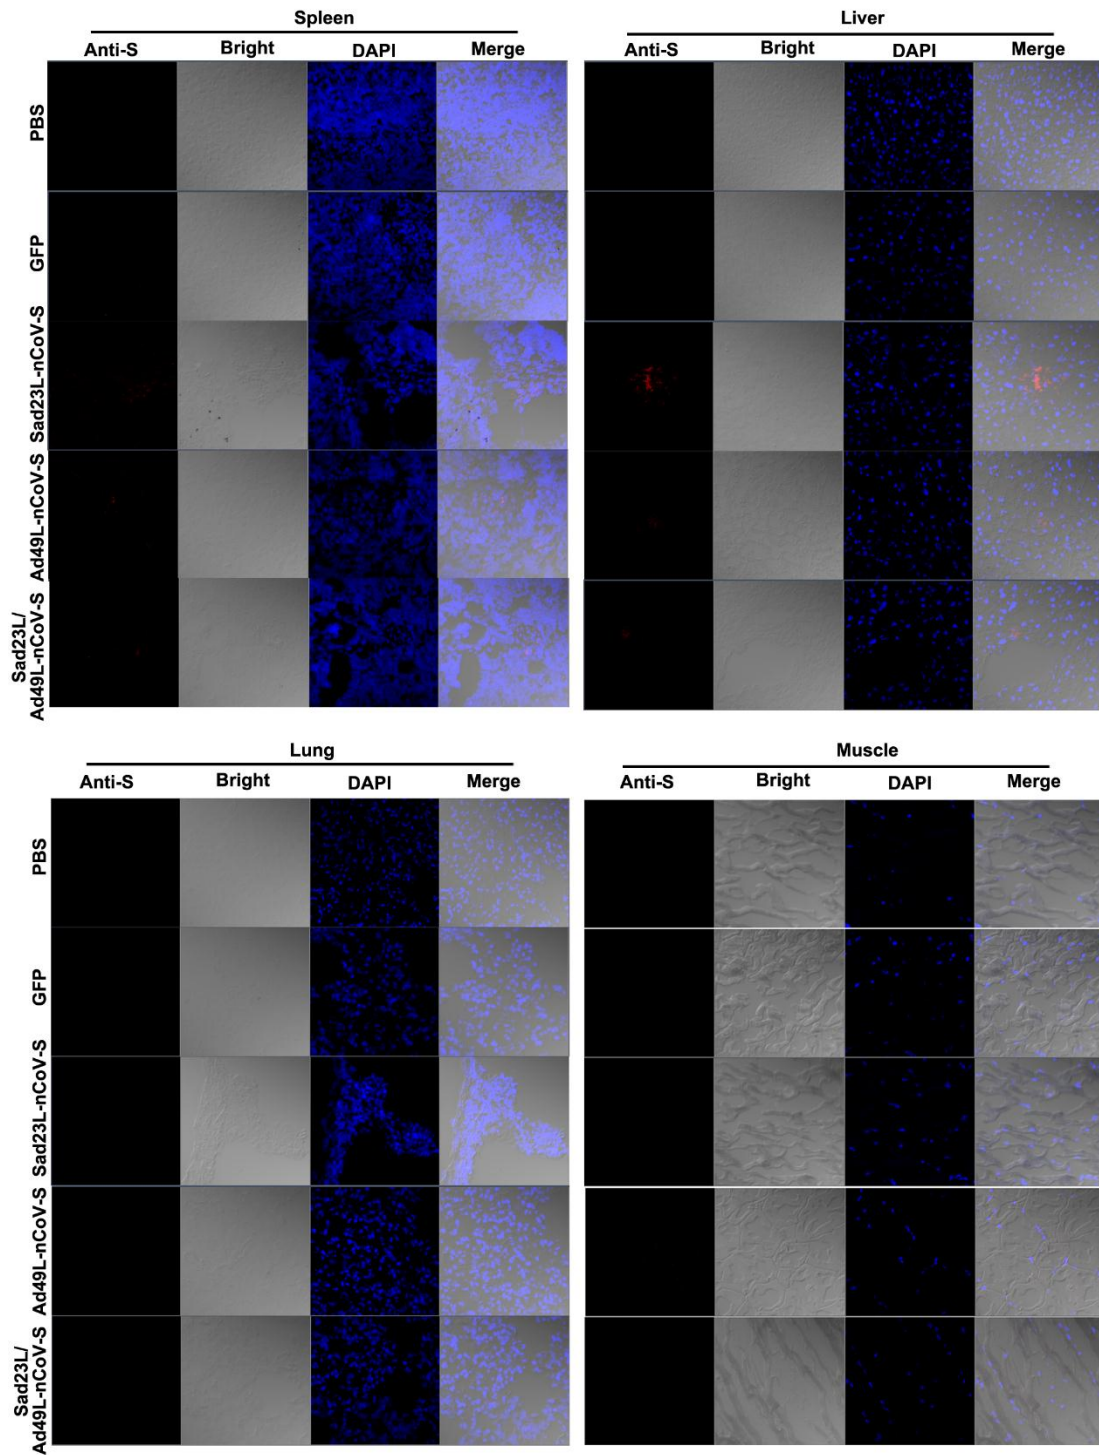

**Fig. S9. Examination of SARS-CoV-2 S protein in the tissues of Sad23L-nCoV-S and Ad49L-nCoV-S immunized mice.** Spleen, liver, Lung and muscle tissues of immunized C57BL/6 mice were examined by immunofluorescence staining with a human monoclonal antibody to SARS-CoV-2 S and DAPI.

**Table S1. Basic information of rhesus macaques pre-vaccination**

| Group       | ID       | Macaques<br>(gender) | Age<br>(year) | Weight<br>(kg) | NAb titer of pre-exposure to |        |       |
|-------------|----------|----------------------|---------------|----------------|------------------------------|--------|-------|
|             |          |                      |               |                | Ad5                          | Sad23L | Ad49L |
| Sham        | 00159    | R3(M)                | 13            | 11.79          | <1:10                        | <1:10  | <1:10 |
|             | 06120011 | R4(M)                | 13            | 6.76           | <1:10                        | <1:10  | <1:10 |
|             | 08050591 | R6(M)                | 12            | 7.99           | <1:10                        | <1:10  | <1:10 |
| Vaccination | 01191    | R1 (M)               | 14            | 11.56          | <1:10                        | <1:10  | <1:10 |
|             | 01399    | R2(M)                | 13            | 7.51           | <1:10                        | <1:10  | <1:10 |
|             | 00943    | R5(M)                | 13            | 9.32           | <1:10                        | <1:10  | <1:10 |
|             | 00807    | R7(M)                | 12            | 10.81          | <1:10                        | <1:10  | <1:10 |
|             | 08040661 | R8 (M)               | 11            | 8.72           | <1:10                        | <1:10  | <1:10 |
|             |          |                      |               |                |                              |        |       |

**Table S2. Measuring of hematological and biochemistry indexes of rhesus macaques in the course of pre- and post-vaccination with Sad23L-nCoV-S and Ad49L-nCoV-S vaccines**

| Animal<br>Days |    | R1        | R2    | R3    | R4    | R5    | R6    | R7    | R8    |
|----------------|----|-----------|-------|-------|-------|-------|-------|-------|-------|
|                |    | <b>TP</b> | 0     | 71.12 | 69.8  | 72.78 | 74.1  | 71.96 | 72.16 |
| <b>g/L</b>     | 7  | 64.37     | 67.35 | 73.1  | 69.97 | 70.21 | 69.94 | 66.56 | 71.74 |
|                | 21 | 72.1      | 73.03 | 76.25 | 72.76 | 76.67 | 73.23 | 72.38 | 75.28 |
|                | 42 | 71.32     | 76.57 | 75.93 | 72.75 | 79.37 | 77.27 | 73.05 | 76.59 |
|                | 56 | 75.88     | 70.74 | 74.55 | 73.72 | 78.55 | 73.88 | 72.9  | 74.13 |
| <b>Alb</b>     | 0  | 43.74     | 45.41 | 42.93 | 44.01 | 40.7  | 44.72 | 44.71 | 45.38 |
| <b>g/L</b>     | 7  | 39.68     | 41.73 | 43.36 | 43.43 | 40.82 | 41.59 | 42.44 | 41.89 |
|                | 21 | 44.74     | 46.31 | 47.16 | 44.55 | 46.3  | 46.27 | 46.18 | 44.97 |
|                | 42 | 43.41     | 47.02 | 45.47 | 42.23 | 44.72 | 45.54 | 45.25 | 44.64 |
|                | 56 | 46.77     | 44.79 | 46.59 | 43.68 | 46.81 | 46.19 | 47.98 | 43.87 |
| <b>Glb</b>     | 0  | 27.38     | 24.39 | 29.85 | 30.09 | 31.26 | 27.44 | 24.07 | 31.51 |
| <b>g/L</b>     | 7  | 24.69     | 25.62 | 29.74 | 26.54 | 29.39 | 28.35 | 24.12 | 29.85 |
|                | 21 | 27.36     | 26.72 | 29.09 | 28.21 | 30.37 | 26.96 | 26.2  | 30.31 |
|                | 42 | 27.91     | 29.55 | 30.46 | 30.52 | 34.65 | 31.73 | 27.8  | 31.95 |
|                | 56 | 29.11     | 25.95 | 27.96 | 30.04 | 31.74 | 27.69 | 24.92 | 30.26 |
| <b>A/G</b>     | 0  | 1.6       | 1.86  | 1.44  | 1.46  | 1.3   | 1.63  | 1.86  | 1.44  |
|                | 7  | 1.61      | 1.63  | 1.46  | 1.64  | 1.39  | 1.47  | 1.76  | 1.4   |
|                | 21 | 1.64      | 1.73  | 1.62  | 1.58  | 1.52  | 1.72  | 1.76  | 1.48  |
|                | 42 | 1.56      | 1.59  | 1.49  | 1.38  | 1.29  | 1.44  | 1.63  | 1.4   |
|                | 56 | 1.61      | 1.73  | 1.67  | 1.45  | 1.47  | 1.67  | 1.93  | 1.45  |
| <b>TBil</b>    | 0  | 5.85      | 3.65  | 2.97  | 3.1   | 2.93  | 3.56  | 4.76  | 3.59  |
| <b>μmol/L</b>  | 7  | 3.32      | 1.81  | 2.39  | 3.17  | 1.8   | 5.88  | 3.41  | 3.04  |
|                | 21 | 1.95      | 2.42  | 2.93  | 2.7   | 2.46  | 3.3   | 1.58  | 3.19  |
|                | 42 | 1.91      | 1.31  | 1.8   | 1.33  | 1.67  | 1.66  | 1.78  | 1.2   |
|                | 56 | 2.21      | 1.22  | 1.8   | 1.6   | 2.28  | 1.55  | 1.38  | 2.38  |
| <b>ALT</b>     | 0  | 100       | 57.7  | 61.3  | 91.8  | 47.7  | 69.7  | 138.6 | 83.8  |
| <b>U/L</b>     | 7  | 96.8      | 65.5  | 44.5  | 61.1  | 55.4  | 78    | 103.3 | 121   |
|                | 21 | 65.9      | 53.9  | 56.4  | 32.6  | 62.2  | 36.9  | 76.3  | 96.8  |
|                | 42 | 63.4      | 46.4  | 70.9  | 21.8  | 63.7  | 36.4  | 56.7  | 49.3  |
|                | 56 | 39.9      | 33.3  | 49    | 19.4  | 48.1  | 24.5  | 52.2  | 27.7  |
| <b>AST</b>     | 0  | 49.7      | 36.7  | 28.8  | 60.2  | 49.7  | 26.2  | 77.3  | 39.1  |
| <b>U/L</b>     | 7  | 47.5      | 33.3  | 32.5  | 51    | 37.9  | 28.9  | 56.3  | 42.4  |
|                | 21 | 31.7      | 29.8  | 25    | 32.7  | 34.8  | 21.2  | 42.3  | 50.1  |
|                | 42 | 27.4      | 31.6  | 31.6  | 29.8  | 33.1  | 21.3  | 31.9  | 28.4  |
|                | 56 | 28.5      | 26.2  | 29    | 33.5  | 31.7  | 20.5  | 36.9  | 26.5  |

|               |    |        |        |        |        |       |        |        |        |
|---------------|----|--------|--------|--------|--------|-------|--------|--------|--------|
| <b>GGT</b>    | 0  | 97.9   | 42.7   | 62.7   | 57.6   | 89.2  | 140.5  | 54.5   | 68.3   |
|               | 7  | 88     | 50.1   | 64.3   | 56.3   | 74.5  | 128.8  | 75.9   | 76     |
| <b>U/L</b>    | 21 | 110.9  | 71.8   | 83.2   | 55     | 77.7  | 164    | 64.9   | 83.5   |
|               | 42 | 84.6   | 74.2   | 77.6   | 52.2   | 70.8  | 169.4  | 56.6   | 77.8   |
|               | 56 | 78.2   | 60.6   | 63.3   | 48.3   | 64.7  | 125    | 61.8   | 70.1   |
| <b>ALP</b>    | 0  | 95.85  | 141.27 | 105.9  | 201.57 | 85.65 | 123.09 | 106.01 | 184.39 |
|               | 7  | 110.17 | 265.49 | 118.37 | 229.04 | 117.7 | 179.86 | 142.02 | 193.16 |
| <b>U/L</b>    | 21 | 113.51 | 220.7  | 119.59 | 183.41 | 83.99 | 149.54 | 116.65 | 161.14 |
|               | 42 | 112.95 | 217.72 | 91.87  | 151.17 | 63.11 | 106.35 | 83.32  | 142.87 |
|               | 56 | 90.59  | 168.74 | 88.32  | 122.93 | 50.26 | 77.8   | 86.85  | 142.28 |
| <b>CK</b>     | 0  | 153.4  | 122.7  | 138.3  | 166.7  | 168.6 | 118.5  | 245.5  | 81.4   |
|               | 7  | 97.8   | 156.8  | 87     | 165.1  | 149.2 | 129.6  | 233.5  | 70.1   |
| <b>U/L</b>    | 21 | 84.1   | 139    | 103.1  | 118.9  | 145.3 | 140.5  | 111.7  | 76.7   |
|               | 42 | 75.6   | 136.6  | 86     | 93     | 163.9 | 81.3   | 128    | 64.9   |
|               | 56 | 83.6   | 101.9  | 101.1  | 90.9   | 107.1 | 71.5   | 108.2  | 53     |
| <b>LDH</b>    | 0  | 344.2  | 302.9  | 215.7  | 336.3  | 275.3 | 224.2  | 430.9  | 198.9  |
|               | 7  | 368.7  | 265.6  | 237.2  | 378.8  | 233.4 | 331.6  | 467.2  | 205.6  |
| <b>U/L</b>    | 21 | 220.9  | 219.2  | 170.1  | 187.3  | 209.2 | 180.1  | 316.6  | 209.6  |
|               | 42 | 199.4  | 253.9  | 155    | 188.5  | 231.2 | 217.7  | 266    | 189.9  |
|               | 56 | 210.4  | 241.1  | 202.5  | 185.8  | 235   | 216.5  | 365.4  | 164.7  |
| <b>GLU</b>    | 0  | 5.63   | 4.79   | 5.88   | 6.2    | 4.94  | 6.66   | 5.11   | 4.59   |
|               | 7  | 3.9    | 3.81   | 4.75   | 4.87   | 4.34  | 4.59   | 3.58   | 4.6    |
| <b>mmol/L</b> | 21 | 4.67   | 4.66   | 5.25   | 5.75   | 5.24  | 4.58   | 5.57   | 5      |
|               | 42 | 4.17   | 4.52   | 4.79   | 5.46   | 6.19  | 6.22   | 5.31   | 5.42   |
|               | 56 | 4.14   | 4      | 4.83   | 5.56   | 4.2   | 6.23   | 4.85   | 4.87   |
| <b>BUN</b>    | 0  | 7.5    | 7.3    | 3.9    | 7.5    | 7.1   | 8.6    | 7.8    | 6.7    |
|               | 7  | 8.3    | 5.3    | 5.5    | 10.3   | 5.8   | 5.1    | 7.1    | 6.1    |
| <b>mmol/L</b> | 21 | 9.1    | 7.1    | 5.3    | 5.2    | 7.1   | 7.3    | 7.8    | 6.4    |
|               | 42 | 6.4    | 6.5    | 6.7    | 7.1    | 5.8   | 6.2    | 7.9    | 6.6    |
|               | 56 | 7.1    | 6.1    | 5.2    | 4.6    | 5.8   | 6.6    | 7.6    | 6.1    |
| <b>CREA</b>   | 0  | 114.3  | 74.9   | 76.6   | 84.7   | 74.2  | 85.4   | 82.9   | 71.4   |
|               | 7  | 95.9   | 65.9   | 77.8   | 90.1   | 82.1  | 77     | 83.6   | 66.8   |
| <b>µmol/L</b> | 21 | 103.3  | 66.5   | 83.7   | 75.2   | 83.6  | 81.1   | 84     | 66.5   |
|               | 42 | 97.3   | 62.6   | 80.5   | 75.2   | 76.6  | 72.1   | 71.4   | 59.9   |
|               | 56 | 107.5  | 53     | 78     | 68.9   | 78.9  | 71.6   | 80.8   | 57.7   |
| <b>CHOL</b>   | 0  | 2.82   | 2.49   | 2.34   | 3.16   | 2.81  | 2.87   | 2.33   | 3.05   |
|               | 7  | 2.7    | 3.11   | 2.7    | 3.47   | 2.74  | 3.2    | 2.51   | 3.16   |
| <b>mmol/L</b> | 21 | 2.47   | 2.9    | 3.05   | 3.53   | 2.78  | 3.57   | 2.37   | 3.17   |
|               | 42 | 2.6    | 3.35   | 3.01   | 3.46   | 3.12  | 3.77   | 2.65   | 3.37   |
|               | 56 | 3.22   | 3.05   | 3.26   | 3.73   | 3.02  | 3.91   | 2.97   | 3.71   |
| <b>TG</b>     | 0  | 0.17   | 0.34   | 0.43   | 0.5    | 0.86  | 0.52   | 0.45   | 0.35   |
|               | 7  | 0.18   | 0.4    | 0.53   | 0.36   | 0.73  | 0.71   | 0.35   | 0.32   |

|               |    |      |      |      |      |      |      |      |      |
|---------------|----|------|------|------|------|------|------|------|------|
| <b>mmol/L</b> | 21 | 0.27 | 0.7  | 0.69 | 0.66 | 0.65 | 0.61 | 0.52 | 0.38 |
|               | 42 | 0.24 | 0.54 | 0.65 | 0.66 | 0.65 | 0.55 | 0.62 | 0.56 |
|               | 56 | 0.33 | 0.54 | 0.55 | 0.84 | 0.53 | 1.08 | 0.54 | 0.85 |

**Table S3. Peptides derived from amino acid sequences of SARS-CoV-2 S protein used in ELISpot and ICS**

| Peptides | Sequence          | Peptides | Sequence       |
|----------|-------------------|----------|----------------|
| 1        | SSVLHSTQDLFLPF    | 41       | TTRTQLPPAYTNSF |
| 2        | FLGVYYHKNNKSWM    | 42       | HTPINLVRDLPQGF |
| 3        | FLPFFSNVTWFHAI    | 43       | TTAPAICHGDKAHF |
| 4        | QGFSALEPLVDLPI    | 44       | KTPPIKDFGGFNFS |
| 5        | KTQSLIVNNTATNV    | 45       | TTDAVRDPQTLEIL |
| 6        | REFVFKNIDGYFKI    | 46       | MSFPQSAPHGVVFL |
| 7        | AAYYVGYLQPRFTL    | 47       | LTPTWRVYSTGSNV |
| 8        | FQFCNDPFLGVYYH    | 48       | LTDEMIAQYTSALL |
| 9        | VSSQCVNLTRRTQL    | 49       | YSNNSIAIPTNFTI |
| 10       | RVYSSANNCTFEYV    | 50       | TITSGWTFGAGAAL |
| 11       | VSGTNGTKRFDNPV    | 51       | LTESNKKFLPFQGF |
| 12       | VVIGIVNNTVYDPL    | 52       | SALLAGTITSGWTF |
| 13       | QVAVLYQDVNCTEV    | 53       | ILPDPSKPSKRSFI |
| 14       | SSVLNDILSRDKV     | 54       | FTRGVYYPDKVFRS |
| 15       | FIAGLIAIVMVTIM    | 55       | STPCNGVEGFNCYF |
| 16       | YQTSNFRVQPTESI    | 56       | CVADYSVLYNSASF |
| 17       | AENSVAYSNNNSIAI   | 57       | DLCFTNVYADSFVI |
| 18       | RSFIEDLLFNKVTL    | 58       | YQPYRVVLSFELL  |
| 19       | AIPTNFTISVTTEI    | 59       | FPNITNLCPFGEVF |
| 20       | SIVRFPNITNLCPF    | 60       | NNLDSKVGGNLYL  |
| 21       | SAPHGVVFLHVTYV    | 61       | YLRLFRKSNLKPF  |
| 22       | VAYSNNNSIAIPTNF   | 62       | DSKVGGNLYLYRL  |
| 23       | FAMQMA YRFNGIGV   | 63       | DYSVLYNSASFSTF |
| 24       | LIAIVMVTIMLCCM    | 64       | CYGVSPTKLNDLCF |
| 25       | TGIAVEQDKNTQEV    | 65       | YGFQPTNGVGYQPY |
| 26       | VFAQVKQIYKTPPI    | 66       | RKRISNCVADYSVL |
| 27       | VTYVPAQEKNFTTA    | 67       | TRFASVYAWNRKRI |
| 28       | NTLVKQLSSNFGAI    | 68       | DFTGCVIAWNSNNL |
| 29       | FQPTNGVGYQPYRV    | 69       | SVLYNSASFSTFKC |
| 30       | QDVVNQNAQALNTL    | 70       | VSPTKLNDLCFTNV |
| 31       | ARSVASQSIIAYTM    | 71       | IAPGQTGKIADYNY |
| 32       | CAQKFNGLTVLPPL    | 72       | FKCYGVSPTKLNDL |
| 33       | GVTQNVLYENQKLI    | 73       | YSVLYNSASFSTFK |
| 34       | ENQKLIANQFNSAI    | 74       | SGINASVVNIQKEI |
| 35       | AEHVNSYECDIPI     | 75       | IAGLIAIVMVTIML |
| 36       | TFGAGAALQIPFAM    | 76       | AKNLNESLIDLQEL |
| 37       | AISSVLNDILSRDL    | 77       | QYIKWPWYIWLGF  |
| 38       | AEIRASANLAATKM    | 78       | VMVTIMLCCMTSCC |
| 39       | IRGWIFGTTLDSTQSSL | 79       | LGKYEQYIKWPWYI |
| 40       | ITPGTNTSNQVAVL    |          |                |



**Table S4. Nested-PCR primers specific for hexon of Sad23L or Ad49L vector**

| Primers           | Sequence (5'-3')     |
|-------------------|----------------------|
| Outer 23-hexon-F1 | GATACTCCCGGTGGCACC   |
| Outer 23-hexon-R1 | CGAAAATGTTACCTTTACAT |
| Inner 23-hexon-F2 | TGAACGGTCAAGACGAGT   |
| Inner 23-hexon-R2 | CCATCTTGACCATCTTTTAC |
| Outer 49-hexon-F1 | GATCTCAGACAAAATGAC   |
| Outer 49-hexon-R1 | CGAACAGGTTGCCCTTGGCG |
| Inner 49-hexon-F2 | CTCAGACAAAATGACACT   |
| Inner 49hexon-R2  | CCAGCAACAGTTGTATCAGG |
